# Supplementary material
Source: PubMed Central journal article supplement (PMC6658325)
Supplement: NIHMS1038064-supplement-Appendix.pdf [file NIHMS1038064-supplement-Appendix.pdf]

## **APPENDICES**

### **Determinants of MRSA prevalence in the Asia Pacific Region: a systematic review and meta-analysis**

|                                                                                |          |
|--------------------------------------------------------------------------------|----------|
| <b>Appendix 1. Supplementary information about materials and methods .....</b> | <b>2</b> |
| <b>Appendix 2: List of included studies .....</b>                              | <b>7</b> |

## Appendix 1. Supplementary information about materials and methods

### 1. Search terms

#### PubMed

#1

((((((((Methicillin-resistant Staphylococcus aureus) OR Meticillin resistant Staphylococcus aureus)) OR (((((Staphylococcus aureus) OR S. aureus) OR S aureus) OR "S. aureus") OR "S aureus")) OR (((((meticillin) OR methicillin)) AND ((resistant) OR resistance)) AND (((((Staphylococcus aureus) OR S. aureus) OR S aureus) OR "S. aureus") OR "S aureus")))))

AND

#2

(((((((((Drug resistance, Microbial) OR antimicrobial resistance) OR antibiotic resistance) OR bacterial resistance) OR methicillin resistance) OR meticillin resistance)) OR (((((((((drug) OR antimicrobial) OR antibiotic) OR bacterial) OR methicillin) OR meticillin)) AND ((resistant) OR resistance))))

AND

#3

((American Samoa OR Australia OR Brunei Darussalam OR Cambodia OR China OR Cook Islands OR Fiji OR French Polynesia OR Guam OR Hong Kong OR Japan OR Kiribati OR Lao People's Democratic Republic OR Laos OR Macao OR Macau OR Malaysia OR Marshall Islands OR Micronesia, Federated States of OR Micronesia OR Mongolia OR Nauru OR New Caledonia OR New Zealand OR Niue OR Northern Mariana Islands, Commonwealth of the OR Palau OR Papua New Guinea OR Philippines OR Pitcairn Islands OR Republic of Korea OR South Korea OR Korea OR Samoa OR Singapore OR Solomon Islands OR Tokelau OR Tonga OR Tuvalu OR Vanuatu OR Viet Nam OR Wallis and Futuna OR Indonesia OR Myanmar OR Burma OR Taiwan OR Thailand OR Timor-Leste OR Asia OR Western Pacific OR Western Pacific Region))

Search term: #1 AND #2 AND #3; Filter: Humans

#### Embase (Embase Classic + Embase 1947 – 2017 February 15)

1. Methicillin-resistant Staphylococcus aureus.mp. or exp methicillin resistant Staphylococcus aureus/
2. Meticillin-resistant Staphylococcus aureus.mp.
3. Methicillin.mp. or exp meticillin/
4. Meticillin.mp. or exp meticillin/
5. resistant.mp.
6. resistance.mp.

7. Staphylococcus aureus.mp. or exp Staphylococcus aureus/
8. "S aureus".mp.
9. methicillin resistant Staphylococcus aureus infection.mp. or exp methicillin resistant Staphylococcus aureus infection/
10. meticillin resistant Staphylococcus aureus infection.mp.
11. 3 or 4
12. 5 or 6
13. 7 or 8
14. 11 and 12 and 13
15. 1 or 2 or 9 or 10 or 13 or 14
16. Drug resistance.mp. or exp drug resistance/
17. antimicrobial resistance.mp.
18. antibiotic resistance.mp. or exp antibiotic resistance/
19. bacterial resistance.mp.
20. methicillin resistance.mp.
21. meticillin resistance.mp.
22. 16 or 17 or 18 or 19 or 20 or 21
23. drug.mp. or exp drug/
24. antimicrobial.mp. or exp antiinfective agent/
25. antibiotic.mp. or exp antibiotic agent/
26. bacterial.mp.
27. methicillin.mp.
28. meticillin.mp. or exp meticillin/
29. 23 or 24 or 25 or 26 or 27 or 28
30. 12 and 29
31. 22 or 30
32. exp American Samoa/ or exp Australia/ or exp Brunei Darussalam/ or exp Cambodia/ or exp China/ or exp Cook Islands/ or exp Fiji/ or exp French Polynesia/ or exp Guam/ or exp Hong Kong/ or exp Japan/ or exp Kiribati/ or exp Lao People's Democratic/ or exp Laos/ or exp Macao/ or exp Macau/ or exp Malaysia/ or exp Marshall Islands/ or exp Micronesia/ or exp Micronesia, federated states/ or exp Mongolia/ or exp Nauru/ or exp New Caledonia/ or exp New Zealand/ or exp Niue/ or exp Northern Mariana Islands, Commonwealth of the/ or exp Palau/ or exp Papua New Guinea/ or exp Philippines/ or exp Pitcairn Islands/ or exp Republic of Korea/ or exp South Korea/ or exp Korea/ or exp Samoa/ or exp Singapore/ or exp Solomon Islands/ or exp Tonga/ or exp Tuvalu/ or exp Vanuatu/ or exp Viet Nam/ or exp "Wallis and Futuna"/ or exp Indonesia/ or exp Myanmar/ or exp Burma/ or exp Taiwan/ or exp Thailand/ or exp Timor-Leste/ or exp Asia/ or exp Western Pacific/ or exp Western Pacific Region/
33. 15 and 31 and 32
34. limit 33 to human

## 2. Data extraction

Two reviewers will extract the following data from each included study using Google Forms: author and year of publication, country, type of study, study period, study population, subject age range, setting, source of infection, sample type (sampling site), sample size, laboratory method, laboratory standard for antimicrobial susceptibility testing, and proportion of resistant *S. aureus* against methicillin, ceftazidime, oxacillin, or flucloxacillin.

Descriptions for specific study types, settings, source of infection, study populations, and laboratory methods will be summarized for clarity and consistency. Studies that assess resistance proportions and MRSA prevalence through descriptive methods such as national/regional surveillance, surveys, and retrospective analysis of hospital or laboratory records will be categorized as prevalence studies. Studies that assess resistance proportions and MRSA prevalence as part of investigations into associations between antimicrobial resistance and pathogen, host, or environmental risk factors will be classified according to their study design. Hospitals, clinics, and other facilities that provide clinical care will be classified as healthcare settings, while training facilities and daycare centers are classified as community settings.

For studies that do not report source of infections, we infer the likely source by their study population and inclusion criteria. For example, studies that include specimens from inpatients without criteria to separate community and hospital-associated infections would likely capture infections from both sources, while studies that include specimens from outpatients would likely consist of infections that are community-associated. Likewise, studies that

include clinical specimens from hospitals or clinics would likely comprise both community and hospital-associated infections. Studies that include specimens from patients admitted before and after a time cut-off of 48 or 72 hours will be considered community-associated and hospital-associated respectively. For studies that do not clearly state its study population, inferences are drawn based on type of infections and medical conditions studied. For instance, severe infections such as bacteremia and pneumonia will be more likely found in inpatients.

In this study, resistance proportion is defined as the proportion of MRSA isolates among *S. aureus* isolates that are tested for antibiotic susceptibility. Prevalence is defined as the proportion of MRSA among the total number of patients sampled or cases/isolates collected in the study, without pre-selection of *S. aureus* infection or isolates. For studies that report overall resistance proportions as well as the breakdown of resistance proportions from different sources of infection or patient populations, we recorded only the resistance proportions that are specifically linked to each source of infection or patient population.

Articles that report resistance proportions and prevalence for different years, populations, or source of infections will have individual entries recorded for each year, population, and source of infection.

### **3. Data analysis**

The overall search results (i.e. resistance proportions and prevalence of MRSA) for all countries with available data will be presented by country and data categories (i.e. source of infection and population type). A meta-analysis will be conducted on extracted MRSA

prevalences and resistance proportions that are Freeman-Tukey (double arcsine) transformed and combined using a DerSimonian-Laird random-effects model. Statistical heterogeneity for MRSA prevalence and resistance proportion will be assessed by the  $I^2$  statistic, which values correspond to the degree of variability in estimates attributable to between-study heterogeneity. As a high degree of variation is expected due to different study locations, study periods, study population, and source of infection, we will conduct meta-regression analyses for MRSA prevalence and resistance proportion separately using multivariable mixed effect models. Covariates of interest include country gross national income (GNI), study year, study population, source of infection, and sampling site. To simplify our analysis, we will group studies that were done in mixed populations (e.g. inpatients, outpatients, and healthy participants) as a “mixed” group. Studies that include samples collected from a combination of the three major sites of interest (blood, respiratory tract, and skin) will be grouped with studies that include samples from other sites, such as ocular and faecal samples; and studies that did not report specific sample collection sites were also included in the “mixed group”. Laboratory methods are grouped into six groups based on the principles underlying the specific antibiotic susceptibility testing method (diffusion methods, dilution methods, screening agar, molecular methods, automated systems, and mixed methods) [REF: CLSI, AMA]. We will assess source of infection and population group as covariates in separate mixed effect models as they are likely to be correlated. All data will be visualized and analyzed in R version 3.4.1 (R Development Core Team, Vienna, Austria) and the *metafor* package.<sup>1</sup>

## Appendix 2: List of included studies

References can be found in Supplementary 1 References

| References                       | Country          | Study period | Type of study   | Setting                | Source of infection <sup>1</sup> | Study population <sup>2</sup>                                     | Antibiotic tested <sup>3</sup> | Resistance proportion (%; 95% CI) <sup>4</sup> |                 | Prevalence (%; 95% CI) <sup>5</sup> |                |
|----------------------------------|------------------|--------------|-----------------|------------------------|----------------------------------|-------------------------------------------------------------------|--------------------------------|------------------------------------------------|-----------------|-------------------------------------|----------------|
| Abu 2016 <sup>2</sup>            | Malaysia         | 2001 – 2011  | Prevalence      | 1 tertiary hospital    | CA                               | Children admitted to hospital with community-acquired bacteraemia | CEF, OXA                       | 7.90                                           | [-0.68, 16.48]  | 1.35 <sup>#</sup>                   | [-0.17, 2.87]  |
| Alesana-Slater 2011 <sup>3</sup> | Samoa            | 2007 – 2008  | Cross-sectional | Hospitals and 1 clinic | Mixed                            | Persons with SSTI                                                 | OXA                            | 17.35                                          | [12.05, 22.65]  | 8.00 <sup>^</sup>                   | [5.41, 10.59]  |
| Al-Talib 2010 <sup>4</sup>       | Malaysia         | 2002 – 2007  | Cross-sectional | 1 tertiary hospital    | HA                               | Patients admitted to different wards                              | CEF                            | 24.13                                          | [23.20, 25.06]  | 1.01 <sup>#</sup>                   | [0.97, 1.05]   |
| Anderson 2014 <sup>5</sup>       | Laos             | 2000 – 2011  | Cross-sectional | 1 government hospital  | ≤ 72 hours of hospitalisation    | Hospitalised infants                                              | OXA                            | 0                                              | NA              | 0 <sup>^</sup>                      | NA             |
| Apisarntharak 2011 <sup>6</sup>  | Thailand         | 2010         | Prevalence      | 1 university hospital  | Carriage                         | Hospitalised patients                                             | OXA                            | NA                                             | NA              | 3.60 <sup>^</sup>                   | [1.29, 5.91]   |
| Asa 2012 <sup>7</sup>            | Papua New Guinea | 2008 – 2009  | Cross-sectional | 1 referral hospital    | CA and HA                        | Surgical patients with BSI                                        | OXA                            | 75.00                                          | [32.57, 117.43] | 2.61 <sup>^</sup>                   | [-0.30, 5.52]  |
| Aung 2011 <sup>8</sup>           | Myanmar          | 2007 – 2008  | Prevalence      | 1 general hospital     | Mixed                            | Clinical specimens                                                | OXA                            | 4.35                                           | [-3.99, 12.68]  | NA                                  | NA             |
| Aung 2012 <sup>9</sup>           | Australia        | 2001         | Cross-sectional | 1 tertiary hospital    | CA and HA                        | BSI isolates from inpatients                                      | FLU                            | 46.00                                          | [36.23, 55.77]  | 11.86 <sup>#</sup>                  | [8.64, 15.07]  |
|                                  | Australia        | 2002         | Cross-sectional | 1 tertiary hospital    | CA and HA                        | BSI isolates from inpatients                                      | FLU                            | 44.20                                          | [35.91, 52.49]  | 14.88 <sup>#</sup>                  | [11.43, 18.32] |
|                                  | Australia        | 2003         | Cross-sectional | 1 tertiary hospital    | CA and HA                        | BSI isolates from inpatients                                      | FLU                            | 61.90                                          | [52.61, 71.19]  | 15.44 <sup>#</sup>                  | [11.99, 18.89] |
|                                  | Australia        | 2004         | Cross-sectional | 1 tertiary hospital    | CA and HA                        | BSI isolates from inpatients                                      | FLU                            | 57.10                                          | [46.52, 67.68]  | 13.15 <sup>#</sup>                  | [9.68, 16.62]  |
|                                  | Australia        | 2005         | Cross-sectional | 1 tertiary hospital    | CA and HA                        | BSI isolates from inpatients                                      | FLU                            | 47.30                                          | [35.90, 58.68]  | 10.70 <sup>#</sup>                  | [7.35, 14.05]  |
|                                  | Australia        | 2006         | Cross-sectional | 1 tertiary hospital    | CA and HA                        | BSI isolates from inpatients                                      | FLU                            | 56.90                                          | [45.46, 68.34]  | 13.85 <sup>#</sup>                  | [9.92, 17.79]  |
|                                  | Australia        | 2007         | Cross-sectional | 1 tertiary hospital    | CA and HA                        | BSI isolates from inpatients                                      | FLU                            | 76.30                                          | [65.06, 87.54]  | 13.95 <sup>#</sup>                  | [10.04, 17.87] |
|                                  | Australia        | 2008         | Cross-sectional | 1 tertiary hospital    | CA and HA                        | BSI isolates from                                                 | FLU                            | 82.50                                          | [70.72, 94.27]  | 11.22 <sup>#</sup>                  | [7.62, 14.83]  |

| References                       | Country           | Study period | Type of study                      | Setting                                     | Source/time of infection | Study population                                                    | Antibiotic tested    | Resistance proportion (%; 95% CI) |                | Prevalence (%; 95% CI) |                |
|----------------------------------|-------------------|--------------|------------------------------------|---------------------------------------------|--------------------------|---------------------------------------------------------------------|----------------------|-----------------------------------|----------------|------------------------|----------------|
| Aung 2012 <sup>9</sup>           | Australia         | 2009         | Cross-sectional                    | 1 tertiary hospital                         | CA and HA                | BSI isolates from inpatients                                        | FLU                  | 72.50                             | [58.66, 86.34] | 11.65 <sup>#</sup>     | [7.66, 15.63]  |
| Baek 2016 <sup>10</sup>          | Republic of Korea | 2010 – 2013  | Prevalence                         | 1 university hospital                       | Mixed                    | Clinical specimens from inpatients                                  | OXA                  | 61.58                             | [56.84, 66.31] | NA                     | NA             |
|                                  | Republic of Korea | 2010 – 2013  | Prevalence                         | 1 university hospital                       | Mixed                    | Clinical specimens from outpatients                                 | OXA                  | 37.03                             | [33.03, 41.03] | NA                     | NA             |
| Bamra 2009 <sup>11</sup>         | Australia         | 2007         | Prevalence                         | 1 hospital emergency department             | Mixed                    | Patients who presented to the emergency department                  | Not applicable (CRA) | 10.96                             | [3.79, 18.13]  | 3.90 <sup>^</sup>      | [1.24, 6.56]   |
| Bennett 2013 <sup>12</sup>       | Australia         | 2006         | Cross-sectional                    | 1 community-based pathology service         | CA                       | Clinical specimens submitted to a community-based pathology service | MET                  | 11.70                             | [10.32, 13.08] | NA                     | NA             |
| Bowen 2014 <sup>13</sup>         | Australia         | 2009 – 2012  | Cross-sectional                    | 12 remote communities                       | Mixed                    | Indigenous children with untreated impetigo                         | CEF                  | 14.94                             | [11.59, 18.29] | 12.80 <sup>^</sup>     | [9.89, 15.70]  |
| Brennan 2013 <sup>14</sup>       | Australia         | 2009         | Cross-sectional                    | 1 tertiary referral hospital                | CA and HA                | Patients ≤ 48 hours of hospital admission                           | OXA                  | 7.25                              | [1.13, 13.37]  | 2.20 <sup>^</sup>      | [0.28, 4.12]   |
|                                  | Australia         | 2010         | Cross-sectional                    | 1 tertiary referral hospital                | CA and HA                | Inpatients who stayed for ≥ 5 days                                  | OXA                  | 54.29                             | [42.62, 65.96] | 18.90 <sup>^</sup>     | [13.49, 24.31] |
| Britton 2013 <sup>15</sup>       | Australia         | 2008         | Retrospective cohort               | 1 children's hospital microbiology database | CA                       | <i>S. aureus</i> isolates with antimicrobial susceptibility data    | CEF                  | 19.30                             | [15.57, 23.03] | NA                     | NA             |
| Cen 2015 <sup>16</sup>           | China             | 2011         | Prevalence                         | 1 tertiary hospital                         | CA and HA                | Hospitalised burn patients                                          | OXA                  | 76.00                             | [67.46, 84.54] | NA                     | NA             |
|                                  | China             | 2012         | Prevalence                         | 1 tertiary hospital                         | CA and HA                | Hospitalised burn patients                                          | OXA                  | 81.20                             | [72.94, 89.46] | NA                     | NA             |
|                                  | China             | 2013         | Prevalence                         | 1 tertiary hospital                         | CA and HA                | Hospitalised burn patients                                          | OXA                  | 86.00                             | [78.99, 93.01] | NA                     | NA             |
| Chan 2009 <sup>17</sup>          | Singapore         | 2007         | Prevalence (hospital surveillance) | 1 general hospital                          | Carriage                 | Healthcare workers                                                  | CEF                  | NA                                | NA             | 20.20 <sup>^</sup>     | [11.86, 28.54] |
| Chan 2015 <sup>18</sup>          | Hong Kong         | 2008         | Prospective cohort                 | 1 surgical unit                             | Carriage                 | Hospitalised nursing home residents                                 | Not applicable (CRA) | NA                                | NA             | 39.06 <sup>^</sup>     | [32.16, 45.96] |
| Chanchaithong 2014 <sup>19</sup> | Thailand          | 2010 – 2012  | Prevalence                         | 1 veterinary teaching hospital              | Mixed                    | Small animal veterinarians                                          | OXA                  | 12.50                             | [-0.73, 25.73] | 1.50 <sup>^</sup>      | [-0.18, 3.18]  |
|                                  | Thailand          | 2010 – 2012  | Prevalence                         | 1 veterinary teaching hospital              | Mixed                    | Dog owners                                                          | OXA                  | 0                                 | NA             | 0 <sup>^</sup>         | NA             |



| References                    | Country | Study period | Type of study   | Setting                                        | Source/time of infection | Study population                                               | Antibiotic tested | Resistance proportion (% , 95% CI) |                | Prevalence (% , 95% CI) |                |
|-------------------------------|---------|--------------|-----------------|------------------------------------------------|--------------------------|----------------------------------------------------------------|-------------------|------------------------------------|----------------|-------------------------|----------------|
| Chang 2015 <sup>20</sup>      | Taiwan  | 2014         | Prevalence      | 2 hospitals                                    | Carriage                 | Janitors                                                       | CEF               | 18.52                              | [3.87, 33.17]  | 2.69 <sup>^</sup>       | [0.36, 5.01]   |
| Changchien 2011 <sup>21</sup> | Taiwan  | 2004 – 2008  | Cross-sectional | 1 hospital                                     | CA                       | Inpatients with necrotising fasciitis                          | OXA               | 27.47                              | [18.3, 36.64]  | 10.12 <sup>^</sup>      | [6.36, 13.88]  |
|                               | Taiwan  | 2004 – 2008  | Cross-sectional | 1 hospital                                     | HA                       | Inpatients with necrotising fasciitis                          | OXA               | 26.37                              | [17.32, 35.43] | 9.72 <sup>^</sup>       | [6.02, 13.41]  |
| Changchien 2016 <sup>22</sup> | Taiwan  | 2008         | Cross-sectional | 1 hospital                                     | CA                       | Cases of <i>S. aureus</i> -associated SSTI                     | OXA               | 22.15                              | [17.50, 26.80] | NA                      | NA             |
|                               | Taiwan  | 2008         | Cross-sectional | 1 hospital                                     | HA                       | Cases of <i>S. aureus</i> -associated SSTI                     | OXA               | 35.50                              | [30.15, 40.86] | NA                      | NA             |
| Chen 2005 <sup>23</sup>       | Taiwan  | 2000 – 2001  | Cross-sectional | 1 hospital                                     | CA                       | Children admitted with a positive culture for <i>S. aureus</i> | OXA               | 47.37                              | [38.20, 56.53] | NA                      | NA             |
|                               | Taiwan  | 2000 – 2001  | Cross-sectional | 1 hospital                                     | HA                       | Children admitted with a positive culture for <i>S. aureus</i> | OXA               | 61.90                              | [51.52, 72.29] | NA                      | NA             |
| Chen 2010 <sup>24</sup>       | Taiwan  | 2008         | Cross-sectional | 1 hospital                                     | Carriage                 | Adult ICU patients                                             | OXA               | 77.03                              | [67.44, 86.61] | 32.20 <sup>^</sup>      | [25.32, 39.09] |
| Chen 2011 <sup>25</sup>       | Taiwan  | 2005 – 2008  | Cross-sectional | General health clinics in 3 hospitals          | Carriage                 | Healthy children who visited general health check-up clinics   | OXA               | 33.69                              | [31.22, 36.16] | 7.81 <sup>^</sup>       | [7.13, 8.48]   |
| Chen 2012 <sup>26</sup>       | Taiwan  | 2007 – 2009  | Cross-sectional | 1 university                                   | Carriage                 | Medical students                                               | CEF               | 11.29                              | [3.41, 19.17]  | 2.17 <sup>^</sup>       | [0.58, 3.77]   |
| Chen 2012b <sup>27</sup>      | China   | 2009         | Prevalence      | 4 burn centres                                 | Mixed                    | Isolates from burn wounds                                      | CEF, OXA          | NA                                 | NA             | 55.30 <sup>^</sup>      | [44.73, 65.87] |
| Chen 2013 <sup>28</sup>       | China   | 2009 – 2011  | Cross-sectional | 3 tertiary hospitals and 1 children's hospital | CA and HA                | Patients with <i>S. aureus</i> BSI                             | CEF, OXA          | 57.40                              | [48.07, 66.73] | NA                      | NA             |
| Chen 2014 <sup>29</sup>       | China   | 2008         | Cross-sectional | 1 general hospital surgical ICU                | Carriage                 | ICU inpatients                                                 | CEF               | NA                                 | NA             | 10.50 <sup>^</sup>      | [8.69, 12.31]  |
|                               | China   | 2009         | Cross-sectional | 1 general hospital surgical ICU                | Carriage                 | ICU inpatients                                                 | CEF               | NA                                 | NA             | 1.90 <sup>#</sup>       | [1.64, 2.16]   |
| Chen 2015 <sup>30</sup>       | China   | 2013 – 2014  | Cross-sectional | 2 university campuses and 1 teaching hospital  | Carriage                 | Volunteers from university campuses and HCW from a hospital    | CEF               | 2.90                               | [0.10, 5.70]   | 0.70 <sup>^</sup>       | [0.03, 1.37]   |

| References               | Country   | Study period | Type of study      | Setting                                                                               | Source/time of infection | Study population                                       | Antibiotic tested | Resistance proportion (% , 95% CI) |                | Prevalence (% , 95% CI) |                |
|--------------------------|-----------|--------------|--------------------|---------------------------------------------------------------------------------------|--------------------------|--------------------------------------------------------|-------------------|------------------------------------|----------------|-------------------------|----------------|
| Chen 2017 <sup>31</sup>  | Taiwan    | 2008 - 2013  | Cross-sectional    | 1 hospital haematological ward                                                        | Mixed                    | Patients with haematological malignancy                | OXA               | 42.11                              | [29.29, 54.92] | 1.15 <sup>#</sup>       | [0.69, 1.61]   |
| Chen 2017b <sup>32</sup> | China     | 2014 - 2015  | Cross-sectional    | 1 university campus                                                                   | Carriage                 | Volunteers residing on a medical campus                | CEF               | 1.4                                | [-1.30, 4.04]  | 0.34 <sup>^</sup>       | [0.32, 1.00]   |
| Chen 2017c <sup>33</sup> | China     | 2008         | Prevalence         | 1 general tertiary-care regional teaching hospital                                    | HA                       | Inpatients                                             | OXA               | 69.5                               | [63.27, 75.73] | NA                      | NA             |
|                          | China     | 2009         | Prevalence         | 1 general tertiary-care regional teaching hospital                                    | HA                       | Inpatients                                             | OXA               | 58.3                               | [52.30, 64.30] | NA                      | NA             |
|                          | China     | 2010         | Prevalence         | 1 general tertiary-care regional teaching hospital                                    | HA                       | Inpatients                                             | OXA               | 50.2                               | [44.09, 56.31] | NA                      | NA             |
|                          | China     | 2011         | Prevalence         | 1 general tertiary-care regional teaching hospital                                    | HA                       | Inpatients                                             | OXA               | 67.4                               | [61.84, 72.96] | NA                      | NA             |
|                          | China     | 2012         | Prevalence         | 1 general tertiary-care regional teaching hospital                                    | HA                       | Inpatients                                             | OXA               | 49.6                               | [44.69, 54.51] | NA                      | NA             |
|                          | China     | 2013         | Prevalence         | 1 general tertiary-care regional teaching hospital                                    | HA                       | Inpatients                                             | OXA               | 48.3                               | [43.88, 52.72] | NA                      | NA             |
|                          | China     | 2014         | Prevalence         | 1 general tertiary-care regional teaching hospital                                    | HA                       | Inpatients                                             | OXA               | 42.1                               | [38.26, 45.94] | NA                      | NA             |
| Cheng 2011 <sup>34</sup> | Hong Kong | 2008         | Prospective cohort | 1 tertiary referral hospital surgical unit                                            | CA and HA                | Inpatients                                             | CEF               | NA                                 | NA             | 9.00 <sup>^</sup>       | [7.83, 10.17]  |
| Cheng 2013 <sup>35</sup> | Hong Kong | 2011         | Prospective cohort | 57 long-term care facilities (LCTF)                                                   | Carriage                 | LCTF residents                                         | CEF, OXA          | NA                                 | NA             | 21.6 <sup>^</sup>       | [19.81, 23.39] |
|                          | Hong Kong | 2011         | Prospective cohort | 1 tertiary referral hospital, three extended-care hospitals and a paediatric hospital | Carriage                 | LCTF residents who are admitted to the five hospitals. | CEF, OXA          | NA                                 | NA             | 15.80 <sup>^</sup>      | [13.81, 17.79] |
| Chi 2004 <sup>36</sup>   | Taiwan    | 2000         | Cross-sectional    | 1 hospital                                                                            | CA                       | Patients admitted with <i>S. aureus</i> BSI            | OXA               | 1.61                               | [0.62, 2.60]   | NA                      | NA             |

|                          |                   |             |                                    |                                      |          |                                                                                                               |                      |       |                 |        |                |
|--------------------------|-------------------|-------------|------------------------------------|--------------------------------------|----------|---------------------------------------------------------------------------------------------------------------|----------------------|-------|-----------------|--------|----------------|
|                          | Taiwan            | 2001        | Cross-sectional                    | 1 hospital                           | CA       | Patients admitted with <i>S. aureus</i> BSI                                                                   | OXA                  | 1.62  | [0.51, 2.73]    | NA     | NA             |
| Chi 2006 <sup>37</sup>   | Taiwan            | 2001 - 2004 | Cross-sectional                    | 1 hospital                           | CA       | Hospitalised children with <i>S. aureus</i> toxic shock and scalded skin syndromes                            | OXA                  | 68.75 | [46.04, 91.46]  | NA     | NA             |
| Cho 2008 <sup>38</sup>   | Republic of Korea | 2004 – 2006 | Prevalence (national surveillance) | 17 public health institutes          | CA       | Acute diarrheal patients                                                                                      | OXA                  | 43.00 | [40.60, 45.40]  | 8.98#  | [8.34, 9.61]   |
| Choi 2009 <sup>39</sup>  | Republic of Korea | 2004 – 2005 | Prevalence                         | A military training facility         | CA       | Korean military recruits                                                                                      | OXA                  | 37.50 | [20.73, 54.27]  | 6.60^  | [2.98, 10.22]  |
| Chou 2015 <sup>40</sup>  | Taiwan            | 2012 – 2013 | Case-control                       | 2 hospitals                          | CA       | Patients registered at dermatology clinics                                                                    | OXA                  | 34.52 | [24.36, 44.69]  | 29.00^ | [20.11, 37.89] |
| Chow 2012 <sup>41</sup>  | Singapore         | 2009 – 2010 | Cross-sectional                    | 1 tertiary hospital                  | CA       | Dermatology patients, patients with HIV infection, and other infectious diseases                              | Not applicable (CRA) | NA    | NA              | 11.80^ | [10.46, 13.14] |
| Chu 2015 <sup>42</sup>   | China             | 2002 – 2014 | Cross-sectional                    | 2 hospitals                          | Mixed    | Renal transplant patients with acute respiratory distress syndrome and pneumonia caused by selected pathogens | MET                  | 94.11 | [82.93, 105.30] | 18.18# | [10.12, 26.24] |
| Chung 2009 <sup>43</sup> | Republic of Korea | 2005 – 2006 | Prevalence                         | 1 eye clinic                         | Carriage | Patients scheduled for refractive surgery                                                                     | CEF                  | 0     | NA              | 0^     | NA             |
| Chung 2011 <sup>44</sup> | Republic of Korea | 2008 – 2009 | Prevalence (regional surveillance) | Tertiary or secondary care Hospitals | HA       | Patients with hospital-acquired pneumonia and ventilator-acquired pneumonia                                   | OXA                  | 80.00 | [70.95, 89.05]  | NA     | NA             |
|                          | China             | 2008 – 2009 | Prevalence (regional surveillance) | Tertiary or secondary care Hospitals | HA       | Patients with hospital-acquired pneumonia and ventilator-acquired pneumonia                                   | OXA                  | 82.40 | [75.01, 89.79]  | NA     | NA             |
|                          | Hong Kong         | 2008 – 2009 | Prevalence (regional surveillance) | Tertiary or secondary care Hospitals | HA       | Patients with hospital-acquired pneumonia and ventilator-acquired pneumonia                                   | OXA                  | 84.80 | [72.55, 97.05]  | NA     | NA             |
|                          | Philippines       | 2008 – 2009 | Prevalence (regional surveillance) | Tertiary or secondary care Hospitals | HA       | Patients with hospital-acquired pneumonia and ventilator-acquired pneumonia                                   | OXA                  | 80.00 | [44.94, 115.06] | NA     | NA             |
|                          | Malaysia          | 2008 – 2009 | Prevalence (regional surveillance) | Tertiary or secondary care Hospitals | HA       | Patients with hospital-acquired pneumonia and ventilator-acquired pneumonia                                   | OXA                  | 60.00 | [29.64, 90.36]  | NA     | NA             |

| References                 | Country   | Study period | Type of study                      | Setting                              | Source/time of infection      | Study population                                                                                                                                | Antibiotic tested     | Resistance proportion (% , 95% CI) |                | Prevalence (% , 95% CI) |                |
|----------------------------|-----------|--------------|------------------------------------|--------------------------------------|-------------------------------|-------------------------------------------------------------------------------------------------------------------------------------------------|-----------------------|------------------------------------|----------------|-------------------------|----------------|
| Chung 2011 <sup>44</sup>   | Singapore | 2008 – 2009  | Prevalence (regional surveillance) | Tertiary or secondary care Hospitals | HA                            | Patients with hospital-acquired pneumonia and ventilator-acquired pneumonia                                                                     | OXA                   | 70.00                              | [41.60, 98.40] | NA                      | NA             |
|                            | Taiwan    | 2008 – 2009  | Prevalence (Regional surveillance) | Tertiary or secondary care Hospitals | HA                            | Patients with hospital-acquired pneumonia and ventilator-acquired pneumonia                                                                     | OXA                   | 50.00                              | [1.00, 99.00]  | NA                      | NA             |
|                            | Thailand  | 2008 – 2009  | Prevalence (Regional surveillance) | Tertiary or secondary care Hospitals | HA                            | Patients with hospital-acquired pneumonia and ventilator-acquired pneumonia                                                                     | OXA                   | 71.4                               | [60.24, 82.56] | NA                      | NA             |
| Coombs 2009 <sup>45</sup>  | Australia | 2006         | Prevalence (national surveillance) | 30 laboratories                      | Mixed                         | Clinical isolates from patients attending clinics, emergency departments or other outpatient settings, or residing in long-term care facilities | CEF, OXA              | 16.00                              | [14.70, 17.30] | NA                      | NA             |
| Coombs 2013 <sup>46</sup>  | Australia | 2011         | Prevalence (national surveillance) | 29 laboratories                      | Mixed                         | <i>S. aureus</i> isolates from hospital inpatients                                                                                              | Not applicable (AUTO) | 30.30                              | [28.40, 32.10] | NA                      | NA             |
| Coombs 2014 <sup>47</sup>  | Australia | 2012         | Prevalence (national surveillance) | 29 laboratories                      | Mixed                         | <i>S. aureus</i> isolates from hospital outpatients                                                                                             | Not applicable (AUTO) | 17.93                              | [16.52, 19.34] | NA                      | NA             |
| Coombs 2014b <sup>48</sup> | Australia | 2013         | Prevalence (national surveillance) | 26 laboratories                      | Mixed                         | <i>S. aureus</i> isolated from blood cultures                                                                                                   | CEF                   | 19.10                              | [17.38, 20.82] | NA                      | NA             |
| Coombs 2016 <sup>49</sup>  | Australia | 2014         | Prevalence (national surveillance) | 27 laboratories                      | CA and HA                     | <i>S. aureus</i> isolated from blood cultures                                                                                                   | Not applicable (AUTO) | 18.77                              | [17.14, 20.40] | NA                      | NA             |
| Dat 2017 <sup>50</sup>     | Vietnam   | 2011 - 2013  | Retrospective cohort               | 1 tertiary teaching hospital         | CA                            | Inpatients with bacterial BSI                                                                                                                   | Not applicable (AUTO) | 38.7                               | [21.56, 55.86] | 3.00 <sup>^</sup>       | [1.33, 4.67]   |
|                            | Vietnam   | 2011 - 2013  | Retrospective cohort               | 1 tertiary teaching hospital         | HA                            | Inpatients with bacterial BSI                                                                                                                   | Not applicable (AUTO) | 0                                  | 0              | 0                       | 0              |
| Deng 2013 <sup>51</sup>    | China     | 2011         | Prospective cohort                 | 5 university teaching hospitals      | > 48 hours of hospitalisation | Patients > age 18 years admitted to ICUs                                                                                                        | CEF, MET, OXA         | NA                                 | NA             | 12.90*                  | [10.38, 15.41] |
| Deng 2014 <sup>52</sup>    | China     | 2008         | Prevalence                         | 3 primary schools                    | Carriage                      | Healthy Tibetan children                                                                                                                        | CEF                   | 0                                  | NA             | 0 <sup>^</sup>          | NA             |

| References                               | Country           | Study period | Type of study      | Setting                                     | Source/time of infection  | Study population                                                 | Antibiotic tested     | Resistance proportion (%; 95% CI) |                | Prevalence (%; 95% CI) |                |
|------------------------------------------|-------------------|--------------|--------------------|---------------------------------------------|---------------------------|------------------------------------------------------------------|-----------------------|-----------------------------------|----------------|------------------------|----------------|
| Deng 2015 <sup>53</sup>                  | China             | 2001 – 2010  | Prevalence         | 1 teaching hospital                         | Mixed                     | Clinical <i>S. aureus</i> isolates                               | CEF                   | 4.20                              | [3.03, 5.37]   | NA                     | NA             |
| Eun 2006 <sup>54</sup>                   | Republic of Korea | 2002         | Cross-sectional    | 8 provincial geriatric hospitals            | Carriage                  | Inpatients                                                       | OXA                   | 71.92                             | [66.97, 76.87] | 36.10^                 | [32.36, 39.84] |
| Fang 2014 <sup>55</sup>                  | Taiwan            | 2012         | Prevalence         | 22 pig farms and 2 pig auction markets      | Carriage                  | Pig farm workers, auction market employees, and regular visitors | CEF                   | NA                                | NA             | 13.00^                 | [6.41, 19.59]  |
| Feng 2013 <sup>56</sup>                  | China             | 2009 – 2011  | Cross-sectional    | 1 teaching hospital                         | Mixed                     | Patients with diabetic foot infections                           | CEF, OXA              | 28.90                             | [22.57, 35.23] | 13.29#                 | [10.08, 16.50] |
| Ghasemzadeh-Moghaddam 2014 <sup>57</sup> | Malaysia          | 2011         | Prevalence         | 1 general hospital                          | ≤ first week of admission | <i>S. aureus</i> isolates from hospitalised patients             | Not applicable (AUTO) | 36.68                             | [30.81, 42.55] | NA                     | NA             |
| Gong 2014 <sup>58</sup>                  | China             | 2011 – 2012  | Cross-sectional    | 1 hospital                                  | Mixed                     | Burn patients in the burn ICU and common burn ward               | CEF, OXA              | 98.40                             | [96.98, 99.82] | 12.40#                 | [11.08, 13.72] |
| Gong 2017 <sup>59</sup>                  | China             | 2012         | Cross sectional    | Primary schools                             | Carriage                  | Healthy Tibetan children                                         | CEF                   | 18.75                             | [-0.38, 37.88] | 0.96^                  | [-0.12, 2.03]  |
| Gu 2015 <sup>60</sup>                    | China             | 2011 – 2012  | Cross-sectional    | 1 trauma medical centre                     | CA and HA                 | <i>S. aureus</i> isolates from orthopaedic patients with SSI     | CEF, OXA              | 43.90                             | [33.16, 54.64] | 5.55#                  | [3.79, 7.31]   |
| Gu 2015b <sup>61</sup>                   | China             | 2011 – 2013  | Cross-sectional    | 3 hospitals                                 | CA and HA                 | SA isolates of patients with SSTI                                | CEF                   | 18.80                             | [11.72, 25.88] | NA                     | NA             |
| Gu 2016 <sup>62</sup>                    | China             | 2016         | Cross-sectional    | 7 nursing homes                             | Carriage                  | Residents in nursing homes                                       | CEF                   | 45.45                             | [35.65, 55.26] | 10.16^                 | [7.34, 12.97]  |
| Gu 2016b <sup>63</sup>                   | China             | 2014 – 2015  | Prevalence         | 2 hospitals                                 | Mixed                     | Patients with SSTI                                               | CEF                   | 25.81                             | [14.91, 36.70] | 25.81^                 | [14.91, 36.70] |
| Hare 2013 <sup>64</sup>                  | Australia         | 2004-2008    | Prospective cohort | 1 hospital clinic                           | Carriage                  | Children diagnosed with non-cystic fibrosis bronchiectasis       | MET                   | 50.00                             | [9.99, 90.01]  | 3.80^                  | [-0.42, 8.02]  |
|                                          | Australia         | 2010         | Prospective cohort | 1 hospital clinic                           | Carriage                  | Children diagnosed with non-cystic fibrosis bronchiectasis       | MET                   | 9.09                              | [-7.90, 26.08] | 1.32^                  | [-1.25, 3.89]  |
| Hart 2015 <sup>65</sup>                  | Australia         | 2010 – 2011  | Cross-sectional    | First biennial assessment of a cohort study | Carriage                  | Patients with type 2 diabetes                                    | Not applicable (CRA)  | 3.10                              | [0.99, 5.22]   | 1.21^                  | [0.38, 2.05]   |
| He 2013 <sup>66</sup>                    | China             | 2010 – 2011  | Cross-sectional    | 16 teaching hospitals                       | HA                        | Inpatients with <i>S. aureus</i> BSI                             | CEF, OXA              | 47.50                             | [41.13, 53.87] | NA                     | NA             |

| References               | Country     | Study period | Type of study   | Setting                                                  | Source/time of infection | Study population                                                   | Antibiotic tested | Resistance proportion (% , 95% CI) |                | Prevalence (% , 95% CI) |               |
|--------------------------|-------------|--------------|-----------------|----------------------------------------------------------|--------------------------|--------------------------------------------------------------------|-------------------|------------------------------------|----------------|-------------------------|---------------|
| Hill 2011 <sup>67</sup>  | New Zealand | 2007 – 2008  | Cross-sectional | 1 tertiary hospital dermatology clinic                   | CA                       | Children aged <18 years with a diagnosis of atopic dermatitis      | CEF               | 2.94                               | [-1.08, 6.96]  | 2.00 <sup>^</sup>       | [-0.74, 4.74] |
| Ho 2008 <sup>68</sup>    | Hong Kong   | 2006 – 2007  | Cross-sectional | 6 regional hospitals                                     | CA                       | Patients with purulent SSTI of less than 7 days' duration          | CEF, OXA          | 15.08                              | [8.83, 21.33]  | 6.38 <sup>^</sup>       | [3.61, 9.15]  |
| Ho 2008b <sup>69</sup>   | Hong Kong   | 2005         | Prevalence      | 487 residential care homes for elderly (RCHE)            | Carriage                 | RCHE residents                                                     | CEF, OXA          | NA                                 | NA             | 5.10 <sup>^</sup>       | [4.01, 6.19]  |
| Ho 2009 <sup>70</sup>    | Hong Kong   | 2000         | Cross-sectional | 1 acute care hospital and 4 convalescence care hospitals | Mixed                    | SA isolates from a hospital-based clinical microbiology laboratory | CEF, OXA          | 36.00                              | [33.76, 38.24] | NA                      | NA            |
|                          | Hong Kong   | 2001         | Cross-sectional | 1 acute care hospital and 4 convalescence care hospitals | Mixed                    | SA isolates from a hospital-based clinical microbiology laboratory | CEF, OXA          | 34.00                              | [31.91, 36.09] | NA                      | NA            |
|                          | Hong Kong   | 2002         | Cross-sectional | 1 acute care hospital and 4 convalescence care hospitals | Mixed                    | SA isolates from a hospital-based clinical microbiology laboratory | CEF, OXA          | 32.40                              | [30.30, 34.50] | NA                      | NA            |
|                          | Hong Kong   | 2003         | Cross-sectional | 1 acute care hospital and 4 convalescence care hospitals | Mixed                    | SA isolates from a hospital-based clinical microbiology laboratory | CEF, OXA          | 35.60                              | [33.38, 37.82] | NA                      | NA            |
|                          | Hong Kong   | 2004         | Cross-sectional | 1 acute care hospital and 4 convalescence care hospitals | Mixed                    | SA isolates from a hospital-based clinical microbiology laboratory | CEF, OXA          | 31.00                              | [28.87, 33.13] | NA                      | NA            |
|                          | Hong Kong   | 2005         | Cross-sectional | 1 acute care hospital and 4 convalescence care hospitals | Mixed                    | SA isolates from a hospital-based clinical microbiology laboratory | CEF, OXA          | 31.50                              | [29.36, 33.64] | NA                      | NA            |
| Ho 2012 <sup>71</sup>    | Hong Kong   | 2009 – 2010  | Cross-sectional | 79 day care centres and 113 kindergartens                | CA                       | Children aged between 2 and 5 years                                | CEF               | 4.59                               | [2.93, 6.25]   | 1.27 <sup>^</sup>       | [0.80, 1.74]  |
| Ho 2015 <sup>72</sup>    | Hong Kong   | 2006 – 2013  | Prevalence      | 1 university                                             | Carriage                 | Year 1 medical students                                            | CEF               | 1.12                               | [0.23, 2.01]   | 0.52 <sup>^</sup>       | [0.10, 0.94]  |
| Hsiao 2016 <sup>73</sup> | Taiwan      | 2003 – 2007  | Prevalence      | Microbiology database of 1 hospital                      | Mixed                    | All corneal scrapings undertaken for cultures                      | OXA               | 58.14                              | [43.39, 72.89] | 5.45 <sup>#</sup>       | [3.37, 7.52]  |
|                          | Taiwan      | 2008 – 2012  | Prevalence      | Microbiology database of 1 hospital                      | Mixed                    | All corneal scrapings undertaken for cultures                      | OXA               | 59.09                              | [44.56, 73.62] | 4.48 <sup>#</sup>       | [2.80, 6.17]  |

| References               | Country | Study period | Type of study                      | Setting                           | Source/time of infection | Study population                                   | Antibiotic tested | Resistance proportion (% , 95% CI) |                | Prevalence (% , 95% CI) |               |
|--------------------------|---------|--------------|------------------------------------|-----------------------------------|--------------------------|----------------------------------------------------|-------------------|------------------------------------|----------------|-------------------------|---------------|
| Hsueh 2001 <sup>74</sup> | Taiwan  | 2000         | Prevalence (national surveillance) | 5 teaching hospitals              | Mixed                    | Clinical specimens of intensive care unit patients | OXA               | 65.83                              | [59.23, 72.42] | 10.28 <sup>#</sup>      | [8.61, 11.95] |
| Hu 2016 <sup>75</sup>    | China   | 2005         | Prevalence (national surveillance) | 8 hospitals                       | Mixed                    | Clinical isolates from inpatients and outpatients  | OXA               | 69.94                              | [67.96, 71.92] | 6.30 <sup>^</sup>       | [6.01, 6.64]  |
|                          | China   | 2006         | Prevalence (national surveillance) | 9 hospitals                       | Mixed                    | Clinical isolates from inpatients and outpatients  | OXA               | 58.19                              | [56.44, 59.94] | 5.24 <sup>^</sup>       | [5.00, 5.48]  |
|                          | China   | 2007         | Prevalence (national surveillance) | 12 hospitals                      | Mixed                    | Clinical isolates from inpatients and outpatients  | OXA               | 58.31                              | [56.65, 59.98] | 5.45 <sup>^</sup>       | [5.22, 5.69]  |
|                          | China   | 2008         | Prevalence (national surveillance) | 12 hospitals                      | Mixed                    | Clinical isolates from inpatients and outpatients  | OXA               | 56.37                              | [54.73, 58.00] | 5.49 <sup>^</sup>       | [5.25, 5.72]  |
|                          | China   | 2009         | Prevalence (national surveillance) | 14 hospitals                      | Mixed                    | Clinical isolates from inpatients and outpatients  | OXA               | 55.25                              | [53.70, 56.80] | 4.96 <sup>^</sup>       | [4.76, 5.17]  |
|                          | China   | 2010         | Prevalence (national surveillance) | 14 hospitals                      | Mixed                    | Clinical isolates from inpatients and outpatients  | OXA               | 51.71                              | [50.24, 53.17] | 4.81 <sup>^</sup>       | [4.62, 5.00]  |
|                          | China   | 2011         | Prevalence (national surveillance) | 15 hospitals                      | Mixed                    | Clinical isolates from inpatients and outpatients  | OXA               | 50.66                              | [49.39, 51.93] | 5.12 <sup>^</sup>       | [4.94, 5.29]  |
|                          | China   | 2012         | Prevalence (national surveillance) | 15 hospitals                      | Mixed                    | Clinical isolates from inpatients and outpatients  | OXA               | 48.84                              | [47.69, 50.00] | 4.86 <sup>^</sup>       | [4.70, 5.02]  |
|                          | China   | 2013         | Prevalence (national surveillance) | 16 hospitals                      | Mixed                    | Clinical isolates from inpatients and outpatients  | OXA               | 44.28                              | [43.21, 45.35] | 4.34 <sup>^</sup>       | [4.20, 4.48]  |
|                          | China   | 2014         | Prevalence (national surveillance) | 17 hospitals                      | Mixed                    | Clinical isolates from inpatients and outpatients  | OXA               | 44.09                              | [42.94, 45.23] | 4.02 <sup>^</sup>       | [3.88, 4.15]  |
| Huang 2005 <sup>76</sup> | Taiwan  | 2001 – 2002  | Cross-sectional                    | 1 child-care centre and 2 schools | Carriage                 | School children                                    | OXA               | 5.26                               | [0.77, 9.75]   | 1.91 <sup>^</sup>       | [0.25, 3.57]  |
|                          | Taiwan  | 2001 – 2002  | Cross-sectional                    | 1 tertiary children's hospital    | Carriage                 | School children                                    | OXA               | 47.37                              | [31.49, 63.24] | 13.14 <sup>^</sup>      | [7.48, 18.8]  |
| Huang 2009 <sup>77</sup> | Taiwan  | 2005 – 2006  | Cross-sectional                    | Delivery rooms of 2 hospitals     | Carriage                 | Parturient mothers visiting delivery rooms         | OXA               | 17.91                              | [11.42, 24.40] | 4.81 <sup>^</sup>       | [2.93, 6.69]  |

| References                       | Country           | Study period | Type of study                      | Setting                                                                    | Source/time of infection | Study population                                          | Antibiotic tested    | Resistance proportion (% , 95% CI) |                 | Prevalence (% , 95% CI) |                |
|----------------------------------|-------------------|--------------|------------------------------------|----------------------------------------------------------------------------|--------------------------|-----------------------------------------------------------|----------------------|------------------------------------|-----------------|-------------------------|----------------|
| Huang 2009 <sup>77</sup>         | Taiwan            | 2005 – 2006  | Cross-sectional                    | Delivery rooms of 2 hospitals                                              | Carriage                 | Babies born to parturient mothers visiting delivery rooms | OXA                  | 6.98                               | [-0.64, 14.59]  | 0.60 <sup>^</sup>       | [-0.08, 1.27]  |
| Huang 2011 <sup>78</sup>         | Taiwan            | 2003 – 2005  | Prevalence                         | 1 hospital                                                                 | CA and HA                | Bacteraemic isolates from adults with cancer              | OXA                  | 55.8                               | [40.96, 70.64]  | 4.08 <sup>#</sup>       | [2.48, 5.68]   |
| Huang 2013 <sup>79</sup>         | Taiwan            | 2010         | Prevalence                         | 1 conference                                                               | Carriage                 | Paediatricians attending a conference                     | Not applicable (PCR) | NA                                 | NA              | 6.82 <sup>^</sup>       | [3.49, 10.15]  |
| Indrawattana 2013 <sup>80</sup>  | Thailand          | 2007, 2010   | Cross-sectional                    | 3 hospitals                                                                | Mixed                    | Clinical specimens of <i>S. aureus</i>                    | OXA, CEF             | 60.87                              | [50.9, 70.84]   | NA                      | NA             |
| Ishihara 2014 <sup>81</sup>      | Japan             | 2008         | Prevalence                         | 71 private veterinary clinics                                              | Carriage                 | Veterinarians and veterinary technicians                  | OXA                  | NA                                 | NA              | 17.47 <sup>#</sup>      | [11.69, 23.25] |
| Issler-Fisher 2016 <sup>82</sup> | Australia         | 2004 – 2014  | Retrospective case-control         | 1 general intensive care unit                                              | HA                       | Inpatients with burns                                     | Not applicable (PCR) | NA                                 | NA              | 10.1 <sup>#</sup>       | [8.42, 11.78]  |
| Jia 2015 <sup>83</sup>           | China             | 2012 – 2013  | Prevalence                         | 1 hospital                                                                 | Mixed                    | Clinical specimens                                        | CEF                  | 29.17                              | [26.9, 31.45]   | 4.24 <sup>#</sup>       | [3.85, 4.62]   |
| Jiang 2016 <sup>84</sup>         | China             | 2008 – 2012  | Prevalence                         | 1 hospital                                                                 | Mixed                    | Hospitalised neonates with sepsis                         | CEF                  | 12.50                              | [-10.42, 35.42] | 0.75 <sup>^</sup>       | [-0.71, 2.22]  |
| Jones 2013 <sup>85</sup>         | China             | 2011         | Prevalence (surveillance)          | 12 medical centres                                                         | Mixed                    | Isolates from bacteraemias, RTI, and skin/SSTIs           | OXA                  | 45.80                              | [40.50, 51.07]  | 6.89 <sup>#</sup>       | [5.85, 7.93]   |
| Jordan 2011 <sup>86</sup>        | Australia         | 2009         | Cross-sectional                    | 4 veterinary conferences                                                   | Carriage                 | Veterinarians                                             | CEF                  | NA                                 | NA              | 5.84 <sup>^</sup>       | [4.18, 7.50]   |
| Kang 2012 <sup>87</sup>          | Taiwan            | 2011         | Prospective cohort                 | 2 hospital outpatient haemodialysis clinics                                | Carriage                 | Patients receiving haemodialysis                          | OXA                  | NA                                 | NA              | 3.78 <sup>#</sup>       | [2.16, 5.41]   |
| Kang 2015 <sup>88</sup>          | Taiwan            | 2010 – 2011  | Prevalence                         | 1 hospital microbiology laboratory                                         | CA and HA                | Patients with <i>S. aureus</i> ocular infections          | CEF                  | 57.63                              | [45.02, 70.24]  | NA                      | NA             |
| Kang 2016 <sup>89</sup>          | Republic of Korea | 2001 – 2008  | Prevalence (national surveillance) | Hospitals that are part of the National Antimicrobial Surveillance Project | Mixed                    | <i>S. aureus</i> isolates of clinical patients            | OXA                  | 81.44                              | [79.01, 83.87]  | NA                      | NA             |
| Kang 2017 <sup>90</sup>          | Republic of Korea | 2014 – 2015  | Cross-sectional                    | 1 children's hospital                                                      | Carriage                 | Inpatients                                                | Not applicable (CRA) | 55.8                               | [42.27, 69.27]  | 25.66                   | [17.61, 33.72] |
| Kawaguchiya 2011 <sup>91</sup>   | Japan             | 2009         | Prevalence                         | Hospitals and clinics in Hokkaido, Japan                                   | CA                       | <i>S. aureus</i> isolates from outpatients                | CEF                  | NA                                 | NA              | 18.62 <sup>#</sup>      | [16.23, 21.02] |



| References                    | Country           | Study period | Type of study      | Setting                                                 | Source/time of infection | Study population                                                                                                 | Antibiotic tested     | Resistance proportion (% , 95% CI) |                | Prevalence (% , 95% CI) |               |
|-------------------------------|-------------------|--------------|--------------------|---------------------------------------------------------|--------------------------|------------------------------------------------------------------------------------------------------------------|-----------------------|------------------------------------|----------------|-------------------------|---------------|
| Kim 2006 <sup>92</sup>        | Republic of Korea | 2002 – 2004  | Prevalence         | 1 teaching hospital department                          | Mixed                    | Patients diagnosed with chronic sinusitis with nasal polyps endoscopic sinus surgery                             | OXA                   | 14.00                              | [-0.18, 28.18] | 2.47^                   | [-0.91, 5.85] |
| Kim 2007 <sup>93</sup>        | Republic of Korea | 2005         | Prevalence         | Laboratories of 7 community-based or tertiary hospitals | CA and HA                | Cultures of patient specimens obtained from outpatient clinics, emergency rooms, or within 72 hours of admission | OXA                   | 58.40                              | [56.70, 60.10] | NA                      | NA            |
| Kim 2014 <sup>94</sup>        | Republic of Korea | 2012         | Cross-sectional    | 16 hospitals                                            | CA                       | Hospitalised cases of SA infections                                                                              | Not applicable (AUTO) | 31.68                              | [26.60, 36.76] | NA                      | NA            |
|                               | Republic of Korea | 2012         | Cross-sectional    | 16 hospitals                                            | HA                       | Hospitalised cases of SA infections                                                                              | Not applicable (AUTO) | 54.50                              | [49.97, 59.03] | NA                      | NA            |
| Kim 2015 <sup>95</sup>        | Republic of Korea | 2008 – 2010  | Prospective cohort | 1 hospital                                              | Carriage                 | Liver transplant recipients                                                                                      | Not applicable (CRA)  | NA                                 | NA             | 8.45^                   | [3.88, 13.03] |
| Kitti 2011 <sup>96</sup>      | Thailand          | 2009 – 2010  | Prevalence         | 1 university                                            | Carriage                 | Undergraduate and graduate microbiology students                                                                 | OXA                   | 6.67                               | [-2.26, 15.59] | 1.00^                   | [-0.38, 2.38] |
| Ko 2005 <sup>97</sup>         | Taiwan            | 2004         | Prevalence         | 1 skin clinic                                           | Mixed                    | Patients attending skin clinic diagnosed with furuncle and carbuncle                                             | OXA                   | 31.11                              | [17.58, 44.64] | 17.07^                  | [8.93, 25.21] |
| Ko 2008 <sup>98</sup>         | Republic of Korea | 2005 – 2006  | Prevalence         | 1 tertiary care hospital's outpatient clinic            | Carriage                 | Children attending outpatient clinic                                                                             | OXA                   | 18.90                              | [11.03, 26.77] | 6.08^                   | [3.36, 8.80]  |
| Ko 2009 <sup>99</sup>         | Republic of Korea | 2006         | Cross-sectional    | 1 tertiary care hospital                                | Mixed                    | SA blood isolates from the emergency department and other wards                                                  | OXA                   | 53.70                              | [44.82, 62.58] | NA                      | NA            |
| Kok 2011 <sup>100</sup>       | Australia         | 2008 – 2010  | Cross-sectional    | 1 tertiary care hospital                                | CA and HA                | Patients with SA bacteraemia episodes                                                                            | MET                   | 40.10                              | [33.08, 47.12] | NA                      | NA            |
| Kunishima 2010 <sup>101</sup> | Japan             | 2004         | Prevalence         | 1 regional acute care hospital                          | Mixed                    | Inpatients                                                                                                       | OXA                   | 45.8                               | [39.12, 52.48] | 0.82^                   | [0.66, 0.98]  |
|                               | Japan             | 2005         | Prevalence         | 1 regional acute care hospital                          | Mixed                    | Inpatients                                                                                                       | OXA                   | 47.6                               | [41.35, 53.84] | 0.93^                   | [0.76, 1.10]  |
|                               | Japan             | 2006         | Prevalence         | 1 regional acute care hospital                          | Mixed                    | Inpatients                                                                                                       | OXA                   | 43.5                               | [37.74, 49.26] | 0.93^                   | [0.77, 1.09]  |

| References                     | Country           | Study period | Type of study      | Setting                                  | Source/time of infection | Study population                                                                | Antibiotic tested    | Resistance proportion (% , 95% CI) |                 | Prevalence (% , 95% CI) |                |
|--------------------------------|-------------------|--------------|--------------------|------------------------------------------|--------------------------|---------------------------------------------------------------------------------|----------------------|------------------------------------|-----------------|-------------------------|----------------|
| Kunishima 2010 <sup>101</sup>  | Japan             | 2007         | Prevalence         | 1 regional acute care hospital           | Mixed                    | Inpatients                                                                      | OXA                  | 44.2                               | [38.32, 50.08]  | 0.89^                   | [0.73, 1.05]   |
|                                | Japan             | 2008         | Prevalence         | 1 regional acute care hospital           | Mixed                    | Inpatients                                                                      | OXA                  | 46.5                               | [41.24, 51.76]  | 1.18^                   | [1.00, 1.36]   |
| Kuntaman 2016 <sup>102</sup>   | Indonesia         | 2014         | Prevalence         | 2 departments in 1 hospital              | Carriage                 | Hospitalised patients at the time of admission                                  | Not applicable (CRA) | NA                                 | NA              | 9.33^                   | [7.08, 11.58]  |
| Kuo 2014 <sup>103</sup>        | Taiwan            | 2011         | Cross-sectional    | Neonatal ICUs in 7 medical centres       | CA and non-CA            | Patients admitted to neonatal ICUs                                              | CEF                  | 33.33                              | [17.25, 49.41]  | 4.38^                   | [1.85, 6.91]   |
| Kuroda 2016 <sup>104</sup>     | Japan             | 2011         | Prevalence         | 2 racehorse training centers             | Carriage                 | Healthy veterinarians                                                           | OXA                  | 88.89                              | [74.37, 103.41] | 30.2^                   | [17.83, 42.55] |
| Kyaw 2012 <sup>105</sup>       | Singapore         | 2008         | Cross-sectional    | 1 referral communicable disease centre   | Carriage                 | HIV-positive patients who attended the specialist outpatient clinic             | Not applicable (CRA) | NA                                 | NA              | 5.10^                   | [2.59, 7.61]   |
| Lai 2011 <sup>106</sup>        | Taiwan            | 2007         | Prospective cohort | 1 hospital outpatient haemodialysis unit | Carriage                 | Outpatient haemodialysis patients                                               | OXA                  | NA                                 | NA              | 9.48^                   | [6.20, 12.76]  |
| Lai 2013 <sup>107</sup>        | Taiwan            | 2000 – 2010  | Cross-sectional    | 1 hospital                               | HA                       | <i>S. aureus</i> bacteraemia isolates tested for oxacillin resistance           | OXA                  | 69.06                              | [67.15, 70.98]  | 7.29#                   | [6.94, 7.64]   |
| Lai 2014 <sup>108</sup>        | Taiwan            | 2000 – 2011  | Prevalence         | 3 hospitals                              | HA                       | <i>S. aureus</i> bacteraemia isolates tested for oxacillin resistance           | OXA                  | 58.25                              | [56.95, 59.56]  | 5.61#                   | [5.42, 5.80]   |
| Lauderdale 2010 <sup>109</sup> | Taiwan            | 2005 – 2006  | Cross-sectional    | 2 hospitals                              | Carriage                 | Hospitalised patients in the ICU                                                | CEF                  | NA                                 | NA              | 23.12^                  | [19.95, 26.29] |
| Le 2006 <sup>110</sup>         | Vietnam           | 2000         | Cross-sectional    | 1 teaching hospital                      | HA                       | All surgical patients admitted to the orthopaedic and neurosurgical departments | MET                  | 90.00                              | [70.00, 109.60] | 1.14^                   | [0.36, 1.93]   |
| Lee 2004 <sup>111</sup>        | Republic of Korea | 2001         | Cross-sectional    | 1 tertiary-care teaching hospital        | Mixed                    | Inpatients                                                                      | OXA                  | 70.20                              | [67.12, 73.28]  | NA                      | NA             |
|                                | Republic of Korea | 2002         | Cross-sectional    | 1 tertiary-care teaching hospital        | Mixed                    | Inpatients                                                                      | OXA                  | 65.70                              | [62.79, 68.61]  | NA                      | NA             |
|                                | Republic of Korea | 2003         | Cross-sectional    | 1 tertiary-care teaching hospital        | Mixed                    | Inpatients                                                                      | OXA                  | 64.10                              | [61.13, 67.07]  | NA                      | NA             |

| References                  | Country           | Study period | Type of study                      | Setting                                       | Source/time of infection | Study population                                                                   | Antibiotic tested    | Resistance proportion (% , 95% CI) |                 | Prevalence (% , 95% CI) |                |
|-----------------------------|-------------------|--------------|------------------------------------|-----------------------------------------------|--------------------------|------------------------------------------------------------------------------------|----------------------|------------------------------------|-----------------|-------------------------|----------------|
| Lee 2007 <sup>112</sup>     | Taiwan            | 2001 – 2005  | Prevalence                         | 1 hospital                                    | CA                       | Hospitalised patients with necrotizing fasciitis                                   | OXA                  | 35.00                              | [14.10, 55.90]  | 13.21^                  | [4.09, 22.32]  |
|                             | Taiwan            | 2001 – 2005  | Prevalence                         | 1 hospital                                    | HA                       | Hospitalised patients with necrotizing fasciitis                                   | OXA                  | 25.00                              | [6.02, 43.98]   | 9.43^                   | [1.56, 17.3]   |
| Lee 2011 <sup>113</sup>     | Republic of Korea | 2008         | Prevalence                         | 7 day care centers                            | CA                       | Healthy preschool-aged children who attend day care centres                        | CEF, OXA             | 24.39                              | [17.82, 30.96]  | 24.39^                  | [17.82, 30.96] |
| Lee 2011b <sup>114</sup>    | Republic of Korea | 2009         | Prevalence (national surveillance) | 24 hospitals                                  | Mixed                    | Bacteria isolates collected from participating hospitals                           | CEF, OXA             | 69.00                              | [68.40, 69.59]  | 11.45#                  | [11.28, 11.62] |
|                             | Republic of Korea | 2009         | Prevalence (national surveillance) | 2 commercial laboratories                     | Mixed                    | Bacteria isolates collected from secondary-care hospitals and primary care clinics | CEF, OXA             | 74.00                              | [73.01, 74.99]  | 8.19#                   | [7.98, 8.40]   |
| Lee 2015 <sup>115</sup>     | Taiwan            | 2013         | Retrospective cohort               | 1 hospital                                    | CA and non-CA            | Hospitalized adults with cellulitis                                                | CEF                  | 50.00                              | [37.75, 62.25]  | 6.88^                   | [4.58, 9.18]   |
| Lestari 2008 <sup>116</sup> | Indonesia         | 2001 – 2002  | Prevalence                         | 2 university hospitals                        | Carriage                 | Inpatient                                                                          | OXA                  | 0                                  | 0               | NA                      | NA             |
|                             | Indonesia         | 2001 – 2002  | Prevalence                         | 2 university hospitals                        | Carriage                 | Outpatient                                                                         | OXA                  | 0                                  | 0               | NA                      | NA             |
|                             | Indonesia         | 2001 – 2002  | Prevalence                         | 2 university hospitals                        | Carriage                 | Healthy participants                                                               | OXA                  | 0                                  | 0               | NA                      | NA             |
| Li 2013 <sup>117</sup>      | China             | 2010         | Cross-sectional                    | 1 children's hospital and 1 teaching hospital | Mixed                    | SA isolates from children below 7 years old with BSI and SSTI                      | Not applicable (PCR) | 22.50                              | [12.79, 32.21]  | NA                      | NA             |
| Li 2014 <sup>118</sup>      | China             | 2011 – 2012  | Cross-sectional                    | 1 teaching hospital ICU                       | Carriage                 | Intensive-care unit patients                                                       | Not applicable (PCR) | NA                                 | NA              | 8.86^                   | [5.88, 11.84]  |
| Li 2015 <sup>119</sup>      | China             | 2011 – 2013  | Prevalence                         | 1 hospital                                    | CA and HA                | Cirrhosis patients with spontaneous peritonitis                                    | CEF                  | 52.17                              | [31.76, 72.59]  | 5.15#                   | [2.31, 7.99]   |
| Li 2016 <sup>120</sup>      | China             | 2008 – 2013  | Prevalence                         | 4 hospitals                                   | Mixed                    | Patients with complicated skin and soft tissue infections                          | MET                  | 18.67                              | [9.85, 27.49]   | 2.66^                   | [1.28, 4.03]   |
| Liao 2005 <sup>121</sup>    | Taiwan            | 2001 – 2002  | Cross-sectional                    | 1 emergency department                        | CA                       | Patients with <i>S. aureus</i> bacteraemia ≤ 48 hours of arrival                   | OXA                  | 97.30                              | [92.07, 102.52] | NA                      | NA             |

| References               | Country   | Study period | Type of study                      | Setting                                              | Source/time of infection | Study population                                                                                                | Antibiotic tested    | Resistance proportion (% , 95% CI) |                | Prevalence (% , 95% CI) |                |
|--------------------------|-----------|--------------|------------------------------------|------------------------------------------------------|--------------------------|-----------------------------------------------------------------------------------------------------------------|----------------------|------------------------------------|----------------|-------------------------|----------------|
| Liao 2005 <sup>121</sup> | Taiwan    | 2001 – 2002  | Cross-sectional                    | 1 emergency department                               | HA                       | Patients with <i>S. aureus</i> bacteremia ≤ 48 hours of arrival                                                 | OXA                  | 57.14                              | [44.18, 70.10] | NA                      | NA             |
| Lim 2014 <sup>122</sup>  | Australia | 2011         | Nested case-control                | 4 co-located long term care facilities               | Carriage                 | Residents at long-term care facilities (LCTF) except those not present with recent admission or palliative care | Not applicable (CRA) | NA                                 | NA             | 16.00 <sup>#</sup>      | [9.30, 22.70]  |
| Lin 2007 <sup>123</sup>  | Taiwan    | 2001         | Prevalence                         | 1 hospital                                           | HA                       | Healthcare workers                                                                                              | OXA                  | 39.02                              | [24.09, 53.96] | 26.23 <sup>^</sup>      | [15.19, 37.27] |
| Lin 2011 <sup>124</sup>  | Taiwan    | 2003 – 2007  | Prevalence                         | 1 hospital department                                | CA and HA                | Patients with SSTI                                                                                              | OXA                  | 52.97                              | [46.60, 59.33] | 28.22 <sup>#</sup>      | [24.03, 32.41] |
| Lin 2012 <sup>125</sup>  | Taiwan    | 2006 – 2008  | Prevalence                         | 1 hospital department                                | Carriage                 | Children with acute rhinosinusitis                                                                              | OXA                  | 68.75                              | [46.04, 91.46] | 15.94 <sup>^</sup>      | [7.30, 24.58]  |
| Lin 2012b <sup>126</sup> | Taiwan    | 2001 - 2010  | Cross-sectional                    | 1 university hospital                                | Mixed                    | Children with otitis media or obstructive sleep apnea undergoing adenoidectomy surgery                          | OXA                  | 35.00                              | [22.93, 47.07] | 7.4 <sup>^</sup>        | [4.37, 10.47]  |
| Lin 2015 <sup>127</sup>  | Taiwan    | 2008 – 2012  | Prevalence                         | 1 hospital database                                  | Mixed                    | Patients with Fournier's gangrene                                                                               | MET                  | 57.14                              | [20.48, 93.80] | 6.56 <sup>#</sup>       | [0.35, 12.77]  |
| Lin 2015b <sup>128</sup> | Taiwan    | 2008 – 2011  | Cross-sectional                    | 1 hospital database                                  | Mixed                    | Patients with septic arthritis                                                                                  | OXA                  | 59.14                              | [49.15, 69.13] | 28.35 <sup>^</sup>      | [22.01, 34.69] |
| Lin 2016 <sup>129</sup>  | China     | 2014 – 2015  | Cross-sectional                    | 11 community settings                                | Carriage                 | People with clinically diagnosed diabetes                                                                       | CEF                  | 47.83                              | [33.39, 62.26] | 4.16 <sup>^</sup>       | [2.46, 5.86]   |
| Lin 2017 <sup>130</sup>  | Taiwan    | 2015         | Cross-sectional                    | 1 burn intensive care unit                           | CA                       | Inpatients with burns                                                                                           | OXA                  | 0                                  | 0              | 0                       | 0              |
| Ling 2003 <sup>131</sup> | Hong Kong | 2000 – 2001  | Prevalence                         | 89 community doctors'/general practitioners' clinics | CA                       | Patients who visit participating doctors' clinics                                                               | MET                  | 2.00                               | [-0.18, 4.18]  | 0.22 <sup>#</sup>       | [-0.03, 0.47]  |
| Liu 2015 <sup>132</sup>  | China     | 2011 – 2012  | Cross-sectional                    | 6 teaching hospitals                                 | Mixed                    | <i>S. aureus</i> isolates from sterile body fluids                                                              | MET                  | 41.85                              | [34.72, 48.98] | NA                      | NA             |
| Liu 2016 <sup>133</sup>  | China     | 2011 – 2013  | Cross-sectional                    | Surgical and dermatological clinics in 3 hospitals   | CA                       | Outpatients with SSTI                                                                                           | CEF                  | 10.34                              | [6.16, 14.53]  | 1.50 <sup>^</sup>       | [0.86, 2.14]   |
| Liu 2016b <sup>134</sup> | China     | 2009 – 2011  | Prevalence (regional surveillance) | 23 hospitals in 6 regions                            | CA                       | Children and adult patients with SSTI                                                                           | OXA                  | 2.62                               | [1.91, 3.33]   | 1.88 <sup>#</sup>       | [1.37, 2.39]   |
| Lu 2005 <sup>135</sup>   | Taiwan    | 2001         | Cross-sectional                    | 1 kindergarten, 3 schools, and healthcare facilities | Carriage                 | Community residents                                                                                             | OXA                  | 16.91                              | [13.75, 20.08] | 4.08 <sup>^</sup>       | [3.26, 4.90]   |

| References                    | Country           | Study period                       | Type of study                              | Setting                                       | Source/time of infection                                          | Study population                                                  | Antibiotic tested    | Resistance proportion (% , 95% CI) |                | Prevalence (% , 95% CI) |                |
|-------------------------------|-------------------|------------------------------------|--------------------------------------------|-----------------------------------------------|-------------------------------------------------------------------|-------------------------------------------------------------------|----------------------|------------------------------------|----------------|-------------------------|----------------|
| Lu 2011 <sup>136</sup>        | Taiwan            | 2009                               | Cross-sectional                            | 1 emergency department                        | CA                                                                | Adult patients visiting an emergency department                   | OXA                  | 21.84                              | [13.16, 30.52] | 3.78^                   | [2.12, 5.45]   |
| Luk 2014 <sup>137</sup>       | Hong Kong         | 2011                               | Cross-sectional                            | 15 acute hospitals                            | Carriage                                                          | Patients admitted to acute medical units                          | Not applicable (CRA) | NA                                 | NA             | 14.30^                  | [13.50, 15.10] |
| Ma 2011 <sup>138</sup>        | China             | 2008 – 2009                        | Cross-sectional                            | 1 teaching hospital                           | Carriage                                                          | Third year students from a medical university                     | OXA                  | 9.40                               | [5.66, 13.14]  | 1.05^                   | [0.61, 1.49]   |
| MacMorran 2017 <sup>139</sup> | Australia         | 2014                               | Prevalence                                 | 1 teaching hospital                           | CA                                                                | Inpatients                                                        | OXA                  | 60.00                              | [52.41, 67.59] | NA                      | NA             |
| Marshall 2014 <sup>140</sup>  | Australia         | 2008 – 2010                        | Cross-sectional                            | 1 tertiary hospital and 1 affiliated hospital | Carriage                                                          | Patients with positive blood cultures for <i>S. aureus</i>        | OXA                  | 15.00                              | [7.13, 22.87]  | 12.00^                  | [5.63, 18.37]  |
| Mat Azis 2017 <sup>141</sup>  | Malaysia          | 2013                               | Cross-sectional                            | 1 tertiary education institution              | Carriage                                                          | Health science undergraduates                                     | CEF                  | 6.67                               | [0.35, 12.98]  | 2.1^                    | [0.06, 4.10]   |
| McDonald 2004 <sup>142</sup>  | Taiwan            | 2000                               | Prevalence (national surveillance)         | 21 hospitals                                  | Mixed                                                             | Outpatients, paediatric inpatients, adult ICU patients            | OXA                  | 59.75                              | [54.94, 64.56] | 27.31#                  | [24.36, 30.27] |
| Mendes 2013 <sup>143</sup>    | Republic of Korea | 2011                               | Prevalence (regional surveillance)         | 2 surveillance sites or hospital laboratories | Mixed                                                             | Isolates of specified Gram-positive and negative pathogens groups | OXA                  | NA                                 | NA             | 73.00#                  | [68.95, 77.05] |
|                               | Philippines       | 2011                               | Prevalence (regional surveillance)         | 1 surveillance site or hospital laboratory    | Mixed                                                             | Isolates of specified Gram-positive and negative pathogens groups | OXA                  | NA                                 | NA             | 59.00#                  | [52.10, 65.90] |
|                               | Australia         | 2011                               | Prevalence (regional surveillance)         | 6 surveillance sites or hospital laboratories | Mixed                                                             | Isolates of specified Gram-positive and negative pathogens groups | OXA                  | NA                                 | NA             | 26.00#                  | [23.45, 28.55] |
|                               | Hong Kong         | 2011                               | Prevalence (regional surveillance)         | 1 surveillance site or hospital laboratory    | Mixed                                                             | Isolates of specified Gram-positive and negative pathogens groups | OXA                  | NA                                 | NA             | 28.00#                  | [22.28, 33.72] |
|                               | Japan             | 2011                               | Prevalence (regional surveillance)         | 4 surveillance sites or hospital laboratories | Mixed                                                             | Isolates of specified Gram-positive and negative pathogens groups | OXA                  | NA                                 | NA             | 41.00#                  | [36.17, 45.83] |
| Malaysia                      | 2011              | Prevalence (regional surveillance) | 1 surveillance site or hospital laboratory | Mixed                                         | Isolates of specified Gram-positive and negative pathogens groups | OXA                                                               | NA                   | NA                                 | 32.00#         | [26.09, 37.91]          |                |

| References                     | Country           | Study period      | Type of study                      | Setting                                         | Source/time of infection | Study population                                                                                     | Antibiotic tested     | Resistance proportion (% , 95% CI) |                | Prevalence (% , 95% CI) |                |
|--------------------------------|-------------------|-------------------|------------------------------------|-------------------------------------------------|--------------------------|------------------------------------------------------------------------------------------------------|-----------------------|------------------------------------|----------------|-------------------------|----------------|
| Mendes 2013 <sup>143</sup>     | New Zealand       | 2011              | Prevalence (regional surveillance) | 2 surveillance sites or hospital laboratories   | Mixed                    | Isolates of specified Gram-positive and negative pathogens groups                                    | OXA                   | NA                                 | NA             | 9.00 <sup>#</sup>       | [6.43, 11.57]  |
|                                | Singapore         | 2011              | Prevalence (regional surveillance) | 1 surveillance site or hospital laboratory      | Mixed                    | Isolates of specified Gram-positive and negative pathogens groups                                    | OXA                   | NA                                 | NA             | 52.00 <sup>#</sup>      | [45.82, 58.18] |
|                                | Thailand          | 2011              | Prevalence (regional surveillance) | 2 surveillance sites or hospital laboratories   | Mixed                    | Isolates of specified Gram-positive and negative pathogens groups                                    | OXA                   | NA                                 | NA             | 53.00 <sup>#</sup>      | [48.29, 57.71] |
| Mine 2013 <sup>144</sup>       | Japan             | 2008 – 2010       | Prevalence                         | 7 clinics and 14 hospitals                      | CA                       | Non-hospitalised patients presenting with skin and soft tissue infections                            | CEF                   | 35.76                              | [30.85, 41.44] | 19.64 <sup>#</sup>      | [16.15, 23.13] |
| Moon 2014 <sup>145</sup>       | Republic of Korea | 2010 – 2013       | Cross-sectional                    | Laboratory and hospital databases at 1 hospital | CA                       | <i>S. aureus</i> isolates                                                                            | Not applicable (AUTO) | 33.00                              | [29.84, 36.16] | NA                      | NA             |
|                                | Republic of Korea | 2010 – 2013       | Cross-sectional                    | Laboratory and hospital databases at 1 hospital | HA                       | <i>S. aureus</i> isolates                                                                            | Not applicable (AUTO) | 73.30                              | [71.26, 75.34] | NA                      | NA             |
| Myat 2014 <sup>146</sup>       | Myanmar           | 2005 – 2008       | Prevalence                         | 1 general hospital                              | Mixed                    | Outpatient or inpatient with suspected BSI or prolonged fever                                        | OXA                   | 38.73                              | [30.72, 46.74] | 2.97 <sup>#</sup>       | [2.20, 3.75]   |
|                                | Myanmar           | 2009 – 2013       | Prevalence                         | 1 general hospital                              | Mixed                    | Outpatient or inpatient with suspected BSI or prolonged fever                                        | OXA                   | 18.75                              | [-0.37, 37.88] | 0.15 <sup>#</sup>       | [-0.02, 0.32]  |
| Nair 2014 <sup>147</sup>       | Mongolia          | 2007 – 2008, 2011 | Prevalence                         | 1 centre for communicable diseases              | Mixed                    | Potentially confirmed <i>S. aureus</i> isolates                                                      | OXA                   | 8.80                               | [2.59, 15.01]  | NA                      | NA             |
| van Nguyen 2014 <sup>148</sup> | Vietnam           | 2012              | Cohort (district surveillance)     | Demographic and health surveillance sites       | Carriage                 | Healthy participants                                                                                 | CEF                   | NA                                 | NA             | 7.90 <sup>^</sup>       | [6.24, 9.55]   |
| Nickerson 2009 <sup>149</sup>  | Thailand          | 2006 – 2007       | Cross-sectional                    | 1 hospital diagnostic microbiology laboratory   | CA and HA                | Patients of any age with at least one sample taken from a sterile site positive for <i>S. aureus</i> | OXA                   | 15.56                              | [11.23, 19.88] | NA                      | NA             |

| References                     | Country   | Study period | Type of study                        | Setting                                             | Source/time of infection         | Study population                                                                                             | Antibiotic tested     | Resistance proportion (% , 95% CI) |                | Prevalence (% , 95% CI) |                |
|--------------------------------|-----------|--------------|--------------------------------------|-----------------------------------------------------|----------------------------------|--------------------------------------------------------------------------------------------------------------|-----------------------|------------------------------------|----------------|-------------------------|----------------|
| Nickerson 2009b <sup>150</sup> | Thailand  | 2006 – 2007  | Cross-sectional                      | 1 hospital                                          | CA and HA                        | Patients with at least 1 clinically significant blood culture positive for a pure growth of <i>S. aureus</i> | OXA                   | 47.37                              | [34.41, 60.33] | 25.47^                  | [17.18, 33.77] |
| Nickerson 2011 <sup>151</sup>  | Cambodia  | 2008         | Prevalence                           | 1 children's hospital                               | Carriage                         | Children admitted in the hospital                                                                            | CEF                   | NA                                 | NA             | 4.10^                   | [0.87, 7.33]   |
|                                | Cambodia  | 2008         | Prevalence                           | 1 children's hospital                               | Carriage                         | Children treated in the outpatient department                                                                | CEF                   | NA                                 | NA             | 3.50^                   | [2.78, 4.22]   |
| Niki 2008 <sup>152</sup>       | Japan     | 2009         | Prevalence (nationwide surveillance) | 32 medical institutions                             | Mixed                            | Patients with RTI                                                                                            | OXA                   | 63.40                              | [56.81, 69.99] | 14.70#                  | [12.37, 17.03] |
| Niki 2009 <sup>153</sup>       | Japan     | 2007         | Prevalence (nationwide surveillance) | 39 medical institutions                             | Mixed                            | Patients with RTI                                                                                            | OXA                   | 59.70                              | [53.31, 66.09] | 12.20#                  | [10.27, 14.13] |
| Niki 2011 <sup>154</sup>       | Japan     | 2008         | Prevalence (nationwide surveillance) | 34 medical institutions                             | Mixed                            | Patients with RTI                                                                                            | OXA                   | 59.80                              | [52.81, 66.79] | 11.45#                  | [9.51, 13.49]  |
| Nimmo 2007 <sup>155</sup>      | Australia | 2005         | Prevalence                           | 27 public and 5 private laboratories                | > 48 hours after hospitalisation | Clinical isolates from patients who are admitted for > 48 hours                                              | CEF, OXA              | 31.90                              | [29.84, 33.96] | NA                      | NA             |
| Nimmo 2011 <sup>156</sup>      | Australia | 2009         | Prevalence                           | 26 hospital laboratories and 4 private laboratories | > 48 hours after hospitalisation | Patients who are admitted for > 48 hours                                                                     | Not applicable (AUTO) | 33.60                              | [31.80, 35.40] | NA                      | NA             |
| Nimmo 2013 <sup>157</sup>      | Australia | 2000         | Prevalence                           | 1 state laboratory                                  | CA and HA                        | Inpatients                                                                                                   | OXA                   | 25.00                              | [21.56, 28.44] | NA                      | NA             |
|                                | Australia | 2000         | Prevalence                           | 1 state laboratory                                  | CA and HA                        | Outpatients                                                                                                  | OXA                   | 11.90                              | [7.77, 16.03]  | NA                      | NA             |
|                                | Australia | 2001         | Prevalence                           | 1 state laboratory                                  | CA and HA                        | Inpatients                                                                                                   | OXA                   | 24.20                              | [20.80, 27.60] | NA                      | NA             |
|                                | Australia | 2001         | Prevalence                           | 1 state laboratory                                  | CA and HA                        | Outpatients                                                                                                  | OXA                   | 10.60                              | [7.00, 14.19]  | NA                      | NA             |
|                                | Australia | 2002         | Prevalence                           | 1 state laboratory                                  | CA and HA                        | Inpatients                                                                                                   | OXA                   | 27.60                              | [23.82, 31.38] | NA                      | NA             |
|                                | Australia | 2002         | Prevalence                           | 1 state laboratory                                  | CA and HA                        | Outpatients                                                                                                  | OXA                   | 12.30                              | [8.52, 16.05]  | NA                      | NA             |
|                                | Australia | 2003         | Prevalence                           | 1 state laboratory                                  | CA and HA                        | Inpatients                                                                                                   | OXA                   | 17.40                              | [14.15, 20.65] | NA                      | NA             |

| References                    | Country   | Study period | Type of study   | Setting                       | Source/time of infection | Study population                                         | Antibiotic tested | Resistance proportion (% , 95% CI) |                | Prevalence (% , 95% CI) |               |
|-------------------------------|-----------|--------------|-----------------|-------------------------------|--------------------------|----------------------------------------------------------|-------------------|------------------------------------|----------------|-------------------------|---------------|
| Nimmo 2013 <sup>157</sup>     | Australia | 2003         | Prevalence      | 1 state laboratory            | CA and HA                | Outpatients                                              | OXA               | 9.71                               | [6.28, 13.14]  | NA                      | NA            |
|                               | Australia | 2004         | Prevalence      | 1 state laboratory            | CA and HA                | Inpatients                                               | OXA               | 19.80                              | [16.58, 23.02] | NA                      | NA            |
|                               | Australia | 2004         | Prevalence      | 1 state laboratory            | CA and HA                | Outpatients                                              | OXA               | 13.40                              | [9.63, 17.17]  | NA                      | NA            |
|                               | Australia | 2005         | Prevalence      | 1 state laboratory            | CA and HA                | Inpatients                                               | OXA               | 20.30                              | [16.93, 23.67] | NA                      | NA            |
|                               | Australia | 2005         | Prevalence      | 1 state laboratory            | CA and HA                | Outpatients                                              | OXA               | 13.80                              | [10.17, 17.42] | NA                      | NA            |
|                               | Australia | 2006         | Prevalence      | 1 state laboratory            | CA and HA                | Inpatients                                               | OXA               | 21.10                              | [17.57, 24.63] | NA                      | NA            |
|                               | Australia | 2006         | Prevalence      | 1 state laboratory            | CA and HA                | Outpatients                                              | OXA               | 12.60                              | [9.12, 16.08]  | NA                      | NA            |
|                               | Australia | 2007         | Prevalence      | 1 state laboratory            | CA and HA                | Inpatients                                               | OXA               | 21.70                              | [18.21, 25.19] | NA                      | NA            |
|                               | Australia | 2007         | Prevalence      | 1 state laboratory            | CA and HA                | Outpatients                                              | OXA               | 14.00                              | [10.75, 17.25] | NA                      | NA            |
|                               | Australia | 2008         | Prevalence      | 1 state laboratory            | CA and HA                | Inpatients                                               | OXA               | 22.00                              | [18.65, 25.35] | NA                      | NA            |
|                               | Australia | 2008         | Prevalence      | 1 state laboratory            | CA and HA                | Outpatients                                              | OXA               | 15.60                              | [12.25, 18.95] | NA                      | NA            |
|                               | Australia | 2009         | Prevalence      | 1 state laboratory            | CA and HA                | Inpatients                                               | OXA               | 24.30                              | [20.78, 27.82] | NA                      | NA            |
|                               | Australia | 2009         | Prevalence      | 1 state laboratory            | CA and HA                | Outpatients                                              | OXA               | 14.40                              | [11.37, 17.43] | NA                      | NA            |
|                               | Australia | 2010         | Prevalence      | 1 state laboratory            | CA and HA                | Inpatients                                               | OXA               | 21.40                              | [17.80, 25.00] | NA                      | NA            |
|                               | Australia | 2010         | Prevalence      | 1 state laboratory            | CA and HA                | Outpatients                                              | OXA               | 18.20                              | [14.76, 21.64] | NA                      | NA            |
|                               | Australia | 2011         | Prevalence      | 1 state laboratory            | CA and HA                | Inpatients                                               | OXA               | 19.90                              | [16.41, 23.39] | NA                      | NA            |
|                               | Australia | 2011         | Prevalence      | 1 state laboratory            | CA and HA                | Outpatients                                              | OXA               | 16.80                              | [13.70, 19.90] | NA                      | NA            |
|                               | Australia | 2012         | Prevalence      | 1 state laboratory            | CA and HA                | Inpatients                                               | OXA               | 14.90                              | [11.98, 17.82] | NA                      | NA            |
|                               | Australia | 2012         | Prevalence      | 1 state laboratory            | CA and HA                | Outpatients                                              | OXA               | 15.10                              | [12.31, 17.88] | NA                      | NA            |
| Nishikawa 2009 <sup>158</sup> | Japan     | 2003         | Cross-sectional | 1 national geriatric hospital | Carriage                 | Patients who are admitted due to acute geriatric illness | OXA               | NA                                 | NA             | 8.00^                   | [3.47, 12.53] |



| References                      | Country     | Study period | Type of study                           | Setting                                                   | Source/time of infection | Study population                                                                                                            | Antibiotic tested    | Resistance proportion (% , 95% CI) |                | Prevalence (% , 95% CI) |               |
|---------------------------------|-------------|--------------|-----------------------------------------|-----------------------------------------------------------|--------------------------|-----------------------------------------------------------------------------------------------------------------------------|----------------------|------------------------------------|----------------|-------------------------|---------------|
| Ong 2013 <sup>159</sup>         | Taiwan      | 2006 – 2010  | Cross-sectional                         | 1 hospital microbiology laboratory                        | Mixed                    | Inpatients and outpatients with <i>S. aureus</i> keratitis                                                                  | CEF                  | 44.07                              | [31.40, 56.74] | NA                      | NA            |
| Otsuka 2012 <sup>160</sup>      | Japan       | 2009 – 2012  | Prevalence                              | 2 hospitals                                               | Carriage and/or CA       | Paediatric outpatients aged 0 -15 years and healthy children aged 3 years and below                                         | OXA                  | NA                                 | NA             | 0.78 <sup>#</sup>       | [0.54, 1.02]  |
| Ozaki 2009 <sup>161</sup>       | Japan       | 2006 – 2007  | Cross-sectional                         | Hospitals                                                 | CA                       | Paediatric outpatients < age 14 years with upper RTI                                                                        | Not applicable (PCR) | NA                                 | NA             | 0.70 <sup>^</sup>       | [-0.09, 1.49] |
|                                 | Japan       | 2007 – 2008  | Cross-sectional                         | Community                                                 | CA                       | Healthy children under age 14 years living with their families                                                              | Not applicable (PCR) | NA                                 | NA             | 3.68 <sup>^</sup>       | [0.52, 6.84]  |
| Patchanee 2014 <sup>162</sup>   | Thailand    | 2012         | Prevalence                              | Pig farms                                                 | LA                       | Farm workers                                                                                                                | CEF                  | 46.67                              | [21.42, 71.91] | 2.54 <sup>#</sup>       | [0.68, 4.39]  |
| Pei 2013 <sup>163</sup>         | China       | 2012         | Prevalence (regional surveillance)      | 1 tertiary-care hospital                                  | Mixed                    | Outpatients and inpatients with urinary, respiratory, wound, bloodstream and other infections                               | OXA                  | 47.00                              | [41.19, 52.81] | 8.10 <sup>#</sup>       | [6.78, 9.42]  |
| Phetsouvanh 2006 <sup>164</sup> | Laos        | 2000 – 2004  | Cross-sectional                         | 1 hospital                                                | CA                       | Patients admitted with suspected community-acquired bacteremia                                                              | MET                  | 0                                  | NA             | 0 <sup>#</sup>          | NA            |
| Qiao 2014 <sup>165</sup>        | China       | 2011 – 2013  | Cross-sectional                         | 3 children's hospitals                                    | CA                       | Patients below age 14 years with invasive CA- <i>S. aureus</i> infections                                                   | Not applicable (PCR) | 43.60                              | [35.99, 51.21] | NA                      | NA            |
| Qu 2010 <sup>166</sup>          | China       | 2007         | Cross-sectional                         | 2 military camps                                          | Carriage                 | Healthy military volunteers                                                                                                 | CEF                  | 0                                  | NA             | 0 <sup>^</sup>          | NA            |
| Rahman 2013 <sup>167</sup>      | Malaysia    | 2001 – 2010  | Cross-sectional                         | Diagnostic microbiology laboratory of a tertiary hospital | Mixed                    | Ocular surface specimen culture records                                                                                     | OXA                  | 31.50                              | [25.14, 37.86] | 7.40 <sup>#</sup>       | [5.96, 8.84]  |
| Raja 2007 <sup>168</sup>        | Malaysia    | 2004 – 2005  | Prevalence                              | Microbiology laboratory of a teaching hospital            | Mixed                    | Inpatients or outpatients with diabetic foot infections with an infected ulcer, wound, osteomyelitis or previous amputation | OXA                  | 16.00                              | [6.48, 25.52]  | 3.14 <sup>^</sup>       | [1.12, 5.16]  |
| Raymond 2006 <sup>169</sup>     | New Zealand | 2001         | Prospective cohort (local surveillance) | Hospitals                                                 | CA and HA                | All positive blood cultures                                                                                                 | OXA                  | 1.54                               | [-1.45, 4.53]  | 0.5 <sup>#</sup>        | [-0.48, 1.48] |

| References                         | Country           | Study period | Type of study                      | Setting                                              | Source/time of infection | Study population                                                                              | Antibiotic tested    | Resistance proportion (% , 95% CI) |                | Prevalence (% , 95% CI) |               |
|------------------------------------|-------------------|--------------|------------------------------------|------------------------------------------------------|--------------------------|-----------------------------------------------------------------------------------------------|----------------------|------------------------------------|----------------|-------------------------|---------------|
| Reinprayoon 2015 <sup>170</sup>    | Thailand          | 2005 – 2009  | Prevalence                         | 1 hospital                                           | Mixed                    | Ocular specimens collected from inpatients diagnosed with vision threatening ocular infection | OXA                  | 0                                  | NA             | 0 <sup>#</sup>          | NA            |
| Safari 2015 <sup>171</sup>         | Indonesia         | 2011         | Prevalence                         | 1 hospital geriatric clinic                          | Carriage                 | Elderly adults attending routine visits at a geriatric clinic                                 | OXA                  | 21.43                              | [9.02, 33.84]  | 6.04 <sup>^</sup>       | [2.22, 9.87]  |
| Santosaningsih 2014 <sup>172</sup> | Indonesia         | 2007 – 2009  | Cross-sectional                    | 3 academic hospitals                                 | Carriage                 | Surgery patients                                                                              | Not applicable (CRA) | 18.07                              | [14.73, 21.42] | 6.13 <sup>^</sup>       | [4.91, 7.34]  |
| Schlebusch 2009 <sup>173</sup>     | Australia         | 2003         | Prevalence                         | 1 hospital                                           | Mixed                    | SA isolates collected as part of a national staphylococcal survey                             | Not applicable (PCR) | 12.38                              | [6.10, 18.70]  | NA                      | NA            |
| Seki 2015 <sup>174</sup>           | Japan             | 2012         | Cross-sectional                    | 1 emergency department of a hospital                 | CA                       | Patients admitted to an emergency department                                                  | OXA                  | NA                                 | NA             | 6.30 <sup>#</sup>       | [1.41, 11.19] |
| Shin 2016 <sup>175</sup>           | Republic of Korea | 2006 – 2008  | Prevalence                         | 25 public health centres                             | Mixed                    | People suspected to be infected with food poisoning                                           | OXA                  | 10.59                              | [7.32, 13.86]  | 0.58 <sup>#</sup>       | [0.39, 0.77]  |
| Song 2011 <sup>176</sup>           | Republic of Korea | 2004 – 2006  | Prevalence (regional surveillance) | 7 tertiary-care or secondary-care teaching hospitals | CA                       | All SA isolates from participating centres                                                    | OXA                  | 15.60                              | [9.73, 21.47]  | NA                      | NA            |
|                                    | Republic of Korea | 2004 – 2006  | Prevalence (regional surveillance) | 7 tertiary-care or secondary-care teaching hospitals | HA                       | All SA isolates from participating centres                                                    | OXA                  | 77.60                              | [74.52, 80.68] | NA                      | NA            |
|                                    | Hong Kong         | 2004 – 2006  | Prevalence (regional surveillance) | 1 tertiary-care or secondary-care teaching hospitals | CA                       | All SA isolates from participating centres                                                    | OXA                  | 8.50                               | [2.46, 14.54]  | NA                      | NA            |
|                                    | Hong Kong         | 2004 – 2006  | Prevalence (regional surveillance) | 1 tertiary-care or secondary-care teaching hospitals | HA                       | All SA isolates from participating centres                                                    | OXA                  | 56.80                              | [51.57, 62.03] | NA                      | NA            |
|                                    | Philippines       | 2004 – 2006  | Prevalence (regional surveillance) | 1 tertiary-care or secondary-care teaching hospitals | CA                       | All SA isolates from participating centres                                                    | OXA                  | 30.10                              | [20.78, 39.42] | NA                      | NA            |
|                                    | Philippines       | 2004 – 2006  | Prevalence (regional surveillance) | 1 tertiary-care or secondary-care teaching hospitals | HA                       | All SA isolates from participating centres                                                    | OXA                  | 38.10                              | [28.44, 47.76] | NA                      | NA            |

| References                       | Country   | Study period | Type of study                        | Setting                                              | Source/time of infection | Study population                                      | Antibiotic tested    | Resistance proportion (%; 95% CI) |                | Prevalence (%; 95% CI) |               |
|----------------------------------|-----------|--------------|--------------------------------------|------------------------------------------------------|--------------------------|-------------------------------------------------------|----------------------|-----------------------------------|----------------|------------------------|---------------|
| Song 2011 <sup>176</sup>         | Vietnam   | 2004 – 2006  | Prevalence (regional surveillance)   | 1 tertiary-care or secondary-care teaching hospitals | CA                       | All SA isolates from participating centres            | OXA                  | 30.10                             | [26.58, 33.62] | NA                     | NA            |
|                                  | Vietnam   | 2004 – 2006  | Prevalence (regional surveillance)   | 1 tertiary-care or secondary-care teaching hospitals | HA                       | All SA isolates from participating centres            | OXA                  | 74.10                             | [67.02, 81.18] | NA                     | NA            |
|                                  | Taiwan    | 2004 – 2006  | Prevalence (regional surveillance)   | 1 tertiary-care or secondary-care teaching hospitals | CA                       | All SA isolates from participating centres            | OXA                  | 34.81                             | [29.13, 40.50] | NA                     | NA            |
|                                  | Taiwan    | 2004 – 2006  | Prevalence (regional surveillance)   | 1 tertiary-care or secondary-care teaching hospitals | HA                       | All SA isolates from participating centres            | OXA                  | 64.98                             | [61.08, 68.89] | NA                     | NA            |
|                                  | Thailand  | 2004 – 2006  | Prevalence (regional surveillance)   | 1 tertiary-care or secondary-care teaching hospitals | CA                       | All SA isolates from participating centres            | OXA                  | 2.46                              | [-0.29, 5.21]  | NA                     | NA            |
|                                  | Thailand  | 2004 – 2006  | Prevalence (regional surveillance)   | 1 tertiary-care or secondary-care teaching hospitals | HA                       | All SA isolates from participating centres            | OXA                  | 56.96                             | [51.50, 62.42] | NA                     | NA            |
| Song 2017 <sup>177</sup>         | China     | 2014 – 2015  | Prevalence                           | 2 teaching children's hospitals                      | Mixed                    | Inpatients                                            | CEF                  | 45.80                             | [36.35, 55.23] | NA                     | NA            |
| Strachan 2011 <sup>178</sup>     | Australia | 2007 – 2009  | Prevalence (national surveillance)   | 13 major paediatric hospitals                        | Mixed                    | Children with childhood empyema                       | Not applicable (PCR) | 53.85                             | [26.75, 80.95] | 4.07^                  | [1.12, 7.02]  |
| Sukhumungoon 2014 <sup>179</sup> | Thailand  | 2010 – 2012  | Prevalence                           | Medical institutes associated with 1 hospital        | HA                       | Healthy students                                      | MET                  | 1.31                              | [-0.49, 3.11]  | 1.31^                  | [-0.49, 3.11] |
| Sun 2006 <sup>180</sup>          | China     | 2003         | Prevalence                           | 10 county hospitals and 1 teaching hospital          | Mixed                    | Clinical bacteria isolates                            | MET                  | 33.47                             | [27.60, 39.34] | NA                     | NA            |
| Suzuki 2015 <sup>181</sup>       | Japan     | 2011 – 2012  | Prevalence (nationwide surveillance) | 26 teaching hospitals                                | Mixed                    | Patients with acute otorhinolaryngological infections | OXA                  | 25.89                             | [17.78, 34.00] | 3.98#                  | [2.56, 5.40]  |
| Syafinaz 2012 <sup>182</sup>     | Malaysia  | 2011         | Cross-sectional                      | 1 medical school                                     | Carriage                 | Medical students                                      | OXA                  | 0                                 | NA             | 0^                     | NA            |
| Taguchi 2012 <sup>183</sup>      | Japan     | 2007         | Prospective cohort                   | 1 tertiary care centre of a teaching hospital        | CA                       | Hospitalised patients                                 | OXA                  | NA                                | NA             | 11.24#                 | [7.45, 15.03] |

| References                       | Country     | Study period | Type of study                             | Setting                                                              | Source/time of infection | Study population                                                         | Antibiotic tested    | Resistance proportion (% , 95% CI) |                | Prevalence (% , 95% CI) |                |
|----------------------------------|-------------|--------------|-------------------------------------------|----------------------------------------------------------------------|--------------------------|--------------------------------------------------------------------------|----------------------|------------------------------------|----------------|-------------------------|----------------|
| Takadama 2017 <sup>184</sup>     | Japan       | 2013 – 2014  | Prevalence                                | 23 medical facilities                                                | CA                       | Outpatients with skin infections                                         | Not applicable (PCR) | 25.60                              | [22.72, 28.57] | 18.94                   | [16.69, 21.2]  |
| Takesue 2012 <sup>185</sup>      | Japan       | 2010         | Cross-sectional (nationwide surveillance) | 27 medical centers                                                   | HA                       | Patients with surgical site infections                                   | OXA                  | 72.00                              | [64.64, 79.36] | 14.67 <sup>#</sup>      | [12.05, 17.29] |
| Takesue 2017 <sup>186</sup>      | Japan       | 2014 – 2015  | Prevalence (nationwide surveillance)      | 27 medical centers                                                   | HA                       | Patients with surgical site infections                                   | MET                  | 53.80                              | [46.02, 61.48] | NA                      | NA             |
| Tang 2011 <sup>187</sup>         | Taiwan      | 2005 – 2008  | Cross-sectional                           | 1 clinical microbiology laboratory                                   | Carriage                 | Healthy children with atopic dermatitis                                  | OXA                  | 36.73                              | [27.19, 46.28] | 19.15 <sup>^</sup>      | [13.52, 24.77] |
| Thuy 2017 <sup>188</sup>         | Vietnam     | 2016         | Prevalence                                | 1 intensive care unit of a tertiary hospital                         | Carriage                 | Inpatients                                                               | OXA                  | 65.50                              | [56.57, 74.34] | 8.59 <sup>^</sup>       | [6.69, 10.49]  |
| Tong 2015 <sup>189</sup>         | Australia   | 2008 – 2012  | Prevalence                                | 1 microbiology laboratory which serves community clinics in a region | CA                       | <i>S. aureus</i> isolates                                                | FLU                  | 24.00                              | [23.27, 24.73] | NA                      | NA             |
| Treesirichod 2013 <sup>190</sup> | Thailand    | 2012         | Cross-sectional                           | 1 university                                                         | Carriage                 | Healthy, third-year, preclinical medical students                        | CEF                  | 0                                  | NA             | 0 <sup>^</sup>          | NA             |
| Tsai 2017 <sup>191</sup>         | Taiwan      | 2005 – 2010  | Prevalence                                | 1 well-child clinic in a tertiary medical center                     | Carriage                 | Healthy children                                                         | OXA                  | 35.90                              | [32.81, 39.01] | 10.2 <sup>^</sup>       | [9.18, 11.28]  |
| Tsao 2015 <sup>192</sup>         | Taiwan      | 2012         | Cross-sectional                           | 14 nursing homes                                                     | Carriage                 | Nursing home residents and staff                                         | CEF                  | 64.02                              | [56.68, 71.37] | 20.08 <sup>^</sup>      | [16.64, 23.51] |
| Uehara 2013 <sup>193</sup>       | Japan       | 2009         | Prevalence                                | 1 haemodialysis clinic                                               | Carriage                 | Patients and healthcare workers                                          | Not applicable (PCR) | 34.48                              | [17.18, 51.78] | 8.90 <sup>^</sup>       | [3.63, 14.17]  |
|                                  | Japan       | 2010         | Prevalence                                | 1 haemodialysis clinic                                               | Carriage                 | Patients and healthcare workers                                          | Not applicable (PCR) | 14.81                              | [1.41, 28.21]  | 3.89 <sup>^</sup>       | [0.15, 7.61]   |
| Valle 2016 <sup>194</sup>        | Philippines | 2013         | Prevalence                                | 1 hospital laboratory                                                | Mixed                    | Clinical <i>S. aureus</i> isolates submitted for culture and sensitivity | OXA, CEF             | 45.76                              | [39.41, 52.12] | NA                      | NA             |
| Verwer 2012 <sup>195</sup>       | Australia   | 2007 – 2008  | Cross-sectional                           | 1 acute care hospital                                                | Carriage                 | Healthcare workers                                                       | CEF                  | NA                                 | NA             | 3.40 <sup>^</sup>       | [2.50, 4.30]   |

| References                     | Country     | Study period | Type of study                        | Setting                       | Source/time of infection | Study population                                                                             | Antibiotic tested     | Resistance proportion (% , 95% CI) |                | Prevalence (% , 95% CI) |                |
|--------------------------------|-------------|--------------|--------------------------------------|-------------------------------|--------------------------|----------------------------------------------------------------------------------------------|-----------------------|------------------------------------|----------------|-------------------------|----------------|
| Wang 2004 <sup>196</sup>       | Taiwan      | 2001         | Prospective cohort                   | 1 teaching hospital           | Carriage                 | Healthcare workers                                                                           | OXA                   | NA                                 | NA             | 8.38 <sup>^</sup>       | [4.32, 12.44]  |
| Wang 2008 <sup>197</sup>       | Taiwan      | 2004 – 2006  | Cross-sectional                      | 1 university hospital         | CA                       | Patients aged > 16 years with positive <i>S. aureus</i> blood cultures ≤ 48 hours of arrival | OXA                   | 13.95                              | [9.32, 18.59]  | NA                      | NA             |
| Wang 2009 <sup>198</sup>       | Taiwan      | 2007         | Prevalence                           | 1 tertiary medical center     | Carriage                 | Patients receiving long-term hemodialysis                                                    | OXA                   | NA                                 | NA             | 5.92 <sup>^</sup>       | [3.93, 7.90]   |
| Wang 2009b <sup>199</sup>      | Taiwan      | 2007         | Cross-sectional                      | 3 medical centres             | Carriage                 | Adults who attended mandatory health examinations                                            | Not applicable (CRA)  | 17.35                              | [14.51, 20.18] | 3.84 <sup>^</sup>       | [3.16, 4.52]   |
| Wang 2010 <sup>200</sup>       | Taiwan      | 2008 – 2009  | Cross-sectional                      | 2 ICUs in 1 hospital          | CA and HA                | Medical intensive care unit and coronary care unit patients                                  | Not applicable (CRA)  | NA                                 | NA             | 10.65 <sup>^</sup>      | [9.27, 12.04]  |
| Wang 2012 <sup>201</sup>       | China       | 2008 – 2010  | Cross-sectional                      | 8 regional hospitals          | CA                       | <i>S. aureus</i> isolates from hospitalised children < age 14 years                          | CEF                   | 55.17                              | [50.50, 59.84] | NA                      | NA             |
| Wang 2012b <sup>202</sup>      | Taiwan      | 2007         | Case-control                         | 3 hospitals                   | Carriage                 | Outpatients undergoing long-term dialysis                                                    | OXA                   | 26.45                              | [18.59, 34.30] | 5.91 <sup>#</sup>       | [3.93, 7.90]   |
| Wang 2015 <sup>203</sup>       | Taiwan      | 2011 – 2013  | Retrospective cohort                 | 1 hospital                    | HA                       | Hospitalised adult patients aged >18 with nosocomial SA bacteraemia                          | Not applicable (CRA)  | 61.30                              | [55.39, 67.21] | 26.14 <sup>#</sup>      | [22.66, 29.63] |
| Wang 2017 <sup>204</sup>       | Taiwan      | 2013         | Cross-sectional                      | 2 universities                | Carriage                 | Healthy students                                                                             | Not applicable (PFGE) | 6.90                               | [0.38, 13.42]  | 1.50 <sup>^</sup>       | [0.04, 3.05]   |
| Wang 2017b <sup>205</sup>      | China       | 2011 – 2014  | Cross-sectional                      | 1 hospital                    | HA                       | Patients with Cardiac Implantable Electronic Device infections                               | OXA                   | 11.10                              | [-9.42, 31.62] | 0.50 <sup>^</sup>       | [-0.44, 1.35]  |
| Wang 2017c <sup>206</sup>      | China       | 2013 - 2014  | Cross-sectional                      | Slaughterhouses and factories | Carriage                 | Healthy workers                                                                              | CEF                   | 23.57                              | [16.54, 30.60] | 2.80 <sup>^</sup>       | [1.84, 3.71]   |
| Watanabe 2012 <sup>207</sup>   | Japan       | 2009         | Prevalence (nationwide surveillance) | 46 medical institutions       | Mixed                    | Patients with RTI                                                                            | OXA                   | 58.50                              | [50.03, 66.97] | 11.97 <sup>#</sup>      | [9.45, 14.49]  |
| Watanabe 2017 <sup>208</sup>   | Japan       | 2013         | Prevalence (nationwide surveillance) | 30 dermatological departments | Mixed                    | Clinical specimens                                                                           | OXA                   | 24.35                              | [20.86, 27.85] | NA                      | NA             |
| Williamson 2016 <sup>209</sup> | New Zealand | 2013         | Cross-sectional                      | 5 schools                     | Carriage                 | Children attending 5 schools                                                                 | OXA                   | 14.62                              | [11.55, 17.70] | 8.24 <sup>^</sup>       | [6.44, 10.04]  |
| Win 2015 <sup>210</sup>        | Singapore   | 2009 – 2010  | Retrospective case-control           | 1 communicable disease centre | Carriage                 | Inpatients                                                                                   | Not applicable (CRA)  | NA                                 | NA             | 12.10 <sup>^</sup>      | [10.75, 13.45] |

| References                     | Country           | Study period | Type of study                      | Setting                                  | Source/time of infection | Study population                                                                              | Antibiotic tested     | Resistance proportion (% , 95% CI) |                | Prevalence (% , 95% CI) |               |
|--------------------------------|-------------------|--------------|------------------------------------|------------------------------------------|--------------------------|-----------------------------------------------------------------------------------------------|-----------------------|------------------------------------|----------------|-------------------------|---------------|
| Win 2015 <sup>210</sup>        | Singapore         | 2009 – 2010  | Retrospective case-control         | 1 communicable disease centre            | HA                       | Inpatients                                                                                    | Not applicable (CRA)  | NA                                 | NA             | 4.80 <sup>^</sup>       | [3.66, 5.94]  |
| Wu 2017 <sup>211</sup>         | Taiwan            | 2009 – 2010  | Cross-sectional                    | Infectious disease clinics at 1 hospital | Carriage                 | Outpatients with HIV                                                                          | Not applicable (CRA)  | 13.4                               | [6.04, 20.79]  | 1.50 <sup>^</sup>       | [0.64, 2.44]  |
| Xiao 2015 <sup>212</sup>       | China             | 2010 – 2011  | Prevalence                         | 31 county hospitals                      | CA                       | Outpatients                                                                                   | OXA                   | 15.34                              | [12.10, 18.58] | 2.48 <sup>#</sup>       | [1.92, 3.04]  |
| Xu 2017 <sup>213</sup>         | China             | 2001 – 2005  | Prevalence (surveillance)          | 1 hospital                               | HA                       | Patients infected by Staphylococci                                                            | OXA                   | 54.40                              | [48.14, 60.66] | NA                      | NA            |
|                                | China             | 2006 – 2010  | Prevalence (surveillance)          | 1 hospital                               | HA                       | Patients infected by Staphylococci                                                            | OXA                   | 71.90                              | [68.00, 75.80] | NA                      | NA            |
|                                | China             | 2011 – 2015  | Prevalence (surveillance)          | 1 hospital                               | HA                       | Patients infected by Staphylococci                                                            | OXA                   | 70.10                              | [67.24, 72.96] | NA                      | NA            |
| Yamaguchi 2005 <sup>214</sup>  | Japan             | 2000         | Prevalence                         | 37 medical centres                       | Mixed                    | Clinical isolates of various bacterial species                                                | Not applicable (AUTO) | 51.55                              | [48.55, 54.55] | NA                      | NA            |
|                                | Japan             | 2002         | Prevalence                         | 37 medical centres                       | Mixed                    | Clinical isolates of various bacterial species                                                | Not applicable (AUTO) | 49.78                              | [47.17, 52.39] | NA                      | NA            |
| Yan 2015 <sup>215</sup>        | China             | 2009 – 2011  | Cross-sectional                    | Mandatory health screening service       | Carriage                 | Food and public service industry workers and public health workers                            | Not applicable (PCR)  | 1.99                               | [0.63, 3.35]   | 0.33 <sup>^</sup>       | [0.10, 0.56]  |
| Yanagihara 2015 <sup>216</sup> | Japan             | 2010         | Prevalence (national surveillance) | 34 medical institutions                  | Mixed                    | Patients with respiratory tract illness                                                       | OXA                   | 50.49                              | [43.66, 57.31] | 10.9 <sup>#</sup>       | [8.92, 12.88] |
| Ye 2015 <sup>217</sup>         | China             | 2013 – 2014  | Cross-sectional                    | Pig farms, abattoirs, and wet markets    | Carriage                 | Workers in livestock-related venues                                                           | OXA, CEF              | 32.00                              | [25.54, 38.47] | 3.40 <sup>^</sup>       | [2.58, 4.22]  |
| Yeap 2017 <sup>218</sup>       | Laos              | 2012 – 2014  | Prevalence                         | 1 hospital microbiology laboratory       | Mixed                    | Inpatients and outpatients with <i>S. aureus</i> SSTI isolates                                | OXA                   | 7.30                               | [2.09, 12.49]  | NA                      | NA            |
| Yeoh 2014 <sup>219</sup>       | Singapore         | 2010 – 2011  | Cross-sectional                    | 1 acute care hospital                    | Carriage                 | Chronic haemodialysis patients who required admission                                         | Not applicable (CRA)  | NA                                 | NA             | 15.10 <sup>^</sup>      | [9.85, 20.35] |
| Yong 2014 <sup>220</sup>       | Republic of Korea | 2011         | Prevalence                         | 32 hospitals                             | Mixed                    | Antimicrobial susceptibility test data from hospital patients                                 | OXA                   | 66.00                              | [65.43, 66.56] | NA                      | NA            |
|                                | Republic of Korea | 2011         | Prevalence                         | 2 commercial laboratories                | Mixed                    | Antimicrobial susceptibility test data from secondary care hospitals and primary care clinics | OXA                   | 66.00                              | [65.01, 66.98] | NA                      | NA            |

| References                 | Country   | Study period | Type of study                      | Setting                                            | Source/time of infection | Study population                                                            | Antibiotic tested     | Resistance proportion (% , 95% CI) |                | Prevalence (% , 95% CI) |                |
|----------------------------|-----------|--------------|------------------------------------|----------------------------------------------------|--------------------------|-----------------------------------------------------------------------------|-----------------------|------------------------------------|----------------|-------------------------|----------------|
| Young 2014 <sup>221</sup>  | Singapore | 2006 – 2007  | Cross-sectional                    | Emergency department of a public tertiary hospital | Carriage                 | Patients > age 16 years planned for hospital admission                      | OXA                   | NA                                 | NA             | 1.79 <sup>^</sup>       | [0.97, 2.61]   |
| Yu 2015 <sup>222</sup>     | China     | 2012 – 2013  | Prevalence                         | 1 hospital                                         | Mixed                    | <i>S. aureus</i> isolates from hospitalised patients with SSTIs             | OXA                   | 44.53                              | [35.92, 53.14] | NA                      | NA             |
| Zhang 2012 <sup>223</sup>  | China     | 2008         | Prevalence                         | 1 hospital                                         | Mixed                    | Trauma patients from the Wenchuan earthquake                                | Not applicable (AUTO) | 58.30                              | [30.40, 86.19] | 4.52 <sup>#</sup>       | [1.24, 7.76]   |
| Zhang 2015 <sup>224</sup>  | China     | 2014         | Prevalence                         | 7 nursing homes                                    | CA                       | Residents from 7 nursing homes                                              | CEF                   | 62.39                              | [53.30, 71.48] | 10.60 <sup>^</sup>      | [7.88, 13.32]  |
| Zhang 2015b <sup>225</sup> | China     | 2006 – 2013  | Cross-sectional                    | 1 hospital                                         | Mixed                    | Inpatients with gram positive cocci isolated                                | Not applicable (CRA)  | 19.57                              | [17.54, 21.59] | 3.71 <sup>#</sup>       | [3.29, 4.13]   |
| Zhao 2012 <sup>226</sup>   | China     | 2005 – 2010  | Prevalence (national surveillance) | 12 teaching hospitals                              | CA                       | Clinical isolates of Gram-positive bacteria                                 | OXA                   | 46.80                              | [44.74, 48.86] | 18.72 <sup>#</sup>      | [17.70, 19.74] |
| Zhao 2012b <sup>227</sup>  | China     | 2009 – 2010  | Prospective cohort                 | 2 teaching hospitals and 2 community hospitals     | CA                       | Adults with SSTI                                                            | OXA                   | 3.05                               | [0.42, 5.68]   | 1.00 <sup>#</sup>       | [0.13, 1.87]   |
| Zhou 2015 <sup>228</sup>   | China     | 2001 – 2014  | Prevalence                         | 2 teaching hospitals                               | HA                       | Liver transplantation recipients who developed <i>S. aureus</i> bacteraemia | OXA                   | 80.00                              | [62.47, 97.53] | 5.82 <sup>^</sup>       | [3.05, 8.59]   |
| Zhu 2016 <sup>229</sup>    | China     | 2001 – 2014  | Prevalence                         | 1 hospital                                         | HA                       | Inpatients with nosocomial infections                                       | OXA                   | 57.90                              | [42.20, 73.60] | 6.23                    | [5.69, 6.78]   |
| Zou 2012 <sup>230</sup>    | China     | 2006 – 2008  | Prevalence                         | 11 public hospitals                                | Mixed                    | Clinical isolates of <i>S. aureus</i>                                       | OXA                   | 64.80                              | [59.33, 70.27] | NA                      | NA             |

## References

1. Viechtbauer W. Conducting Meta-Analyses in R with the metafor Package. *J Stat Softw.* 2010;36(3):48.
2. Abu NA, Nor FM, Mohamad M, Abidin ASZ, Adnan A, Nor NSM, et al. Community-acquired Bacteremia in paediatrics: Epidemiology, aetiology and patterns of antimicrobial resistance in a tertiary care centre, Malaysia. *Med J Malaysia.* 2016;71(3):117-21.
3. Alesana-Slater J, Ritchie SR, Heffernan H, Camp T, Richardson A, Herbison P, et al. Methicillin-resistant *Staphylococcus aureus*, Samoa, 2007-2008. *Emerg Infect Dis.* 2011;17(6):1023-9.
4. Al-Talib HI, Yean CY, Al-Jashamy K, Hasan H. Methicillin-resistant *Staphylococcus aureus* nosocomial infection trends in Hospital Universiti Sains Malaysia during 2002-2007. *Ann Saudi Med.* 2010;30(5):358-63.
5. Anderson M, Luangxay K, Sisouk K, Vorlasan L, Soumphonphakdy B, Sengmouang V, et al. Epidemiology of bacteremia in young hospitalized infants in Vientiane, Laos, 2000-2011. *J Trop Pediatr.* 2014;60(1):10-6.
6. Apisarnthanarak A, Warren DK, Fraser VJ. Prevalence of nasal carriage of mupirocin-resistant *Staphylococcus aureus* among hospitalized patients in Thailand. *Infect Control Hosp Epidemiol.* 2011;32(5):522-3.
7. Asa H, Laman M, Greenhill AR, Siba PM, Davis TM, Maihua J, et al. Bloodstream infections caused by resistant bacteria in surgical patients admitted to Modilon Hospital, Madang. *P N G Med J.* 2012;55(1-4):5-11.



8. Aung MS, Urushibara N, Kawaguchiya M, Aung TS, Mya S, San T, et al. Virulence factors and genetic characteristics of methicillin-resistant and -susceptible *Staphylococcus aureus* isolates in Myanmar. *Microb Drug Resist*. 2011;17(4):525-35.
9. Aung AK, Skinner MJ, Lee FJ, Cheng AC. Changing epidemiology of bloodstream infection pathogens over time in adult non-specialty patients at an Australian tertiary hospital. *Commun Dis Intell Q Rep*. 2012;36(4):E333-41.
10. Baek YS, Jeon J, Ahn JW, Song HJ. Antimicrobial resistance of *Staphylococcus aureus* isolated from skin infections and its implications in various clinical conditions in Korea. *Int J Dermatol*. 2016;55(4):e191-7.
11. Bamra A, Bhandari R, de Wit D, Yates M. The prevalence of methicillin-resistant *Staphylococcus aureus* (MRSA) carriage in patients presenting to a hospital emergency department. *Pathology*. 2009;41(6):609-11.
12. Bennett CM, Coombs GW, Wood GM, Howden BP, Johnson LE, White D, et al. Community-onset *Staphylococcus aureus* infections presenting to general practices in South-eastern Australia. *Epidemiol Infect*. 2014;142(3):501-11.
13. Bowen AC, Tong SYC, Chatfield MD, Carapetis JR. The microbiology of impetigo in Indigenous children: Associations between, scabies, and nasal carriage. *BMC Infect Dis*. 2014;14 (1) (no pagination)(727).
14. Brennan L, Lilliebridge RA, Cheng AC, Giffard PM, Currie BJ, Tong SY. Community-associated methicillin-resistant *Staphylococcus aureus* carriage in hospitalized patients in tropical northern Australia. *J Hosp Infect*. 2013;83(3):205-11.
15. Britton PN, Andresen DN. Paediatric community-associated *Staphylococcus aureus*: a retrospective cohort study. *J Paediatr Child Health*. 2013;49(9):754-9.

16. Cen H, Wu Z, Wang F, Han C. Pathogen distribution and drug resistance in a burn ward: A three-year retrospective analysis of a single center in China. *Int J Clin Exp Med*. 2015;8(10):19188-99.
17. Chan KS, Ling ML, Hsu LY, Tan AL. Methicillin-resistant *Staphylococcus aureus* throat colonization among healthcare workers during an outbreak in Singapore General Hospital. *Infect Control Hosp Epidemiol*. 2009;30(1):95-7.
18. Chan TC, Cheng VC, Hung IF, Chan FH, Ng WC, Yuen KY. The association between methicillin resistant *staphylococcus aureus* colonization and mortality in Chinese nursing home older adults: a 2-year prospective cohort. *J Am Med Dir Assoc*. 2015;16(9):796-7.
19. Chanchaithong P, Perreten V, Schwendener S, Tribuddharat C, Chongthaleong A, Niyomtham W, et al. Strain typing and antimicrobial susceptibility of methicillin-resistant coagulase-positive staphylococcal species in dogs and people associated with dogs in Thailand. *J Appl Microbiol*. 2014;117(2):572-86.
20. Chang CJ, Chen NC, Lao CK, Huang YC. Nasal *Staphylococcus aureus* and Methicillin-resistant *S. aureus* carriage among janitors working in hospitals in northern Taiwan. *PLoS One*. 2015;10(9):e0138971.
21. Changchien CH, Chen YY, Chen SW, Chen WL, Tsay JG, Chu C. Retrospective study of necrotizing fasciitis and characterization of its associated methicillin-resistant *Staphylococcus aureus* in Taiwan. *BMC Infect Dis*. 2011;11:297.
22. Changchien CH, Chen SW, Chen YY, Chu C. Antibiotic susceptibility and genomic variations in *Staphylococcus aureus* associated with Skin and Soft Tissue Infection (SSTI) disease groups. *BMC Infect Dis*. 2016;16 (1) (no pagination)(276).

23. Chen CJ, Huang YC, Chiu CH, Su LH, Lin TY. Clinical features and genotyping analysis of community-acquired methicillin-resistant *Staphylococcus aureus* infections in Taiwanese children. *Pediatr Infect Dis J*. 2005;24(1):40-5.
24. Chen CB, Chang HC, Huang YC. Nasal methicillin-resistant *Staphylococcus aureus* carriage among intensive care unit hospitalised adult patients in a Taiwanese medical centre: one time-point prevalence, molecular characteristics and risk factors for carriage. *J Hosp Infect*. 2010;74(3):238-44.
25. Chen CJ, Hsu KH, Lin TY, Hwang KP, Chen PY, Huang YC. Factors associated with nasal colonization of methicillin-resistant *Staphylococcus aureus* among healthy children in Taiwan. *J Clin Microbiol*. 2011;49(1):131-7.
26. Chen CS, Chen CY, Huang YC. Nasal carriage rate and molecular epidemiology of methicillin-resistant *Staphylococcus aureus* among medical students at a Taiwanese university. *Int J Infect Dis*. 2012;16(11):e799-803.
27. Chen X, Yang HH, Huangfu YC, Wang WK, Liu Y, Ni YX, et al. Molecular epidemiologic analysis of *Staphylococcus aureus* isolated from four burn centers. *Burns*. 2012;38(5):738-42.
28. Chen X, Wang WK, Han LZ, Liu Y, Zhang H, Tang J, et al. Epidemiological and genetic diversity of *Staphylococcus aureus* causing bloodstream infection in Shanghai, 2009-2011. *PLoS One*. 2013;8(9):e72811.
29. Chen Y, Zhao W, Liu H, Song Q, Wang Y, Zhao J, et al. Occurrence of nosocomial methicillin-resistant *Staphylococcus aureus* as a marker for transmission in a surgical intensive care unit in China. *Am J Infect Control*. 2014;42(4):436-8.

30. Chen B, Dai X, He B, Pan K, Li H, Liu X, et al. Differences in *Staphylococcus aureus* nasal carriage and molecular characteristics among community residents and healthcare workers at Sun Yat-Sen University, Guangzhou, Southern China. *BMC Infect Dis.* 2015;15:303.
31. Chen CY, Tien FM, Sheng WH, Huang SY, Yao M, Tang JL, et al. Clinical and microbiological characteristics of bloodstream infections among patients with haematological malignancies with and without neutropenia at a medical centre in northern Taiwan, 2008-2013. *Int J Antimicrob Agents.* 2017;08.
32. Chen BJ, Xie XY, Ni LJ, Dai XL, Lu Y, Wu XQ, et al. Factors associated with *Staphylococcus aureus* nasal carriage and molecular characteristics among the general population at a medical college campus in Guangzhou, south China. *Ann Clin Microbiol Antimicrob.* 2017;16(1):28.
33. Chen K, Huang Y, Song Q, Wu C, Chen X, Zeng L. Drug-resistance dynamics of *Staphylococcus aureus* between 2008 and 2014 at a tertiary teaching hospital, Jiangxi Province, China. *BMC Infect Dis.* 2017;17(1):97.
34. Cheng VC, Chan JF, Lau EH, Yam WC, Ho SK, Yau MC, et al. Studying the transmission dynamics of methicillin-resistant *Staphylococcus aureus* in Hong Kong using spa typing. *J Hosp Infect.* 2011;79(3):206-10.
35. Cheng VC, Tai JW, Wong ZS, Chen JH, Pan KB, Hai Y, et al. Transmission of methicillin-resistant *Staphylococcus aureus* in the long term care facilities in Hong Kong. *BMC Infect Dis.* 2013;13:205.
36. Chi CY, Wong WW, Fung CP, Yu KW, Liu CY. Epidemiology of community-acquired *Staphylococcus aureus* bacteremia. *J Microbiol Immunol Infect.* 2004;37(1):16-23.

37. Chi CY, Wang SM, Lin HC, Liu CC. A clinical and microbiological comparison of *Staphylococcus aureus* toxic shock and scalded skin syndromes in children. *Clin Infect Dis*. 2006;42(2):181-5.
38. Cho SH, Shin HH, Choi YH, Park MS, Lee BK. Enteric bacteria isolated from acute diarrheal patients in the Republic of Korea between the year 2004 and 2006. *J Microbiol*. 2008;46(3):325-30.
39. Choi CM, Kang CI, Kim YK, Heo ST, Kim CH, Song JK, et al. Community-associated methicillin-resistant *Staphylococcus aureus* colonization in the upper respiratory tracts of Korean military recruits. *Tuberc Respir Dis*. 2009;67(5):409-12.
40. Chou YH, Lee MS, Lin RY, Wu CY. Risk factors for methicillin-resistant *Staphylococcus aureus* skin and soft-tissue infections in outpatients in Taiwan. *Epidemiol Infect*. 2015;143(4):749-53.
41. Chow A, Win MK, Wong CS, Leo YS. Universal methicillin-resistant *Staphylococcus aureus* (MRSA) screening: comparison of anatomic screening sites for patients with high and low prevalence of MRSA carriage. *Infect Control Hosp Epidemiol*. 2012;33(3):315-7.
42. Chu L, Ye QF, Wan QQ, Zhou JD. Mortality Predictors in Acute Respiratory Distress Syndrome Renal Transplant Recipients With ESKAPE/rESKAPE Pneumonia. *Transplant Proc*. 2015;47(8):2450-5.
43. Chung JL, Seo KY, Yong DE, Mah FS, Kim TI, Kim EK, et al. Antibiotic susceptibility of conjunctival bacterial isolates from refractive surgery patients. *Ophthalmology*. 2009;116(6):1067-74.

44. Chung DR, Song JH, Kim SH, Thamlikitkul V, Huang SG, Wang H, et al. High prevalence of multidrug-resistant nonfermenters in hospital-acquired pneumonia in Asia. *Am J Respir Crit Care Med.* 2011;184(12):1409-17.
45. Coombs GW, Nimmo GR, Pearson JC, Christiansen KJ, Bell JM, Collignon PJ, et al. Prevalence of MRSA strains among *Staphylococcus aureus* isolated from outpatients, 2006. *Commun Dis Intell Q Rep.* 2009;33(1):10-20.
46. Coombs GW, Nimmo GR, Pearson JC, Collignon PJ, Bell JM, McLaws ML, et al. Australian Group on Antimicrobial Resistance Hospital-onset *Staphylococcus aureus* Surveillance Programme annual report, 2011. *Commun Dis Intell Q Rep.* 2013;37(3):E210-8.
47. Coombs GW, Daly DA, Pearson JC, Nimmo GR, Collignon PJ, McLaws ML, et al. Community-onset *Staphylococcus aureus* Surveillance Programme annual report, 2012. *Commun Dis Intell Q Rep.* 2014;38(1):E59-69.
48. Coombs GW, Nimmo GR, Daly DA, Le TT, Pearson JC, Tan HL, et al. Australian *Staphylococcus aureus* Sepsis Outcome Programme annual report, 2013. *Commun Dis Intell Q Rep.* 2014;38(4):E309-19.
49. Coombs GW, Daley DA, Thin Lee Y, Pearson JC, Robinson JO, Nimmo GR, et al. Australian Group on Antimicrobial Resistance Australian *Staphylococcus aureus* Sepsis Outcome Programme annual report, 2014. *Commun Dis Intell Q Rep.* 2016;40(2):E244-54.
50. Dat VQ, Vu HN, Nguyen The H, Nguyen HT, Hoang LB, Vu Tien Viet D, et al. Bacterial bloodstream infections in a tertiary infectious diseases hospital in Northern Vietnam: aetiology, drug resistance, and treatment outcome. *BMC Infect Dis.* 2017;17(1):493.

51. Deng LJ, Wu XD, Kang Y, Xu Y, Zhou JX, Wang DF, et al. Epidemiology of methicillin-resistant *Staphylococcus aureus* infection and empirical antibiotic therapy for MRSA infection: multicenter investigation. *Chin Med J (Engl)*. 2013;126(19):3745-9.
52. Deng JJ, Xiao GG, Zhu Y, Zhou W, Wan CM. *Staphylococcus aureus* nasal carriage and its antibiotic resistance profiles in Tibetan school children in southwest China. *HK J Paediatr*. 2014;19(2):75-8.
53. Deng Y, Liu J, Peters BM, Chen L, Miao J, Li B, et al. Antimicrobial resistance investigation on *Staphylococcus* strains in a local hospital in Guangzhou, China, 2001-2010. *Microb Drug Resist*. 2015;21(1):102-4.
54. Eun SH, Lee YS, Cha JO, Yoo JI, Lee JG, Lee HJ, et al. The point prevalence and associated factors of nasal methicillin-resistant *Staphylococcus aureus* colonisation in eight geriatric hospitals in Korea. *Clin Microbiol Infect*. 2006;12(1):81-3.
55. Fang HW, Chiang PH, Huang YC. Livestock-associated methicillin-resistant *Staphylococcus aureus* ST9 in pigs and related personnel in Taiwan. *PLoS One*. 2014;9(2):e88826.
56. Feng SH, Chu YJ, Wang PH, Jun X, Min D, Li XM. Risk factors and gene type for infections of MRSA in diabetic foot patients in Tianjin, China. *Int J Low Extrem Wounds*. 2013;12(2):106-12.
57. Ghasemzadeh-Moghaddam H, van Belkum A, Hamat RA, van Wamel W, Neela V. Methicillin-susceptible and -resistant *Staphylococcus aureus* with high-level antiseptic and low-level mupirocin resistance in Malaysia. *Microb Drug Resist*. 2014;20(5):472-7.

58. Gong Y, Chen J, Liu C, Zhang C, Luo X, Peng Y. Comparison of pathogens and antibiotic resistance of burn patients in the burn ICU or in the common burn ward. *Burns*. 2014;40(3):402-7.
59. Gong Z, Shu M, Xia Q, Tan S, Zhou W, Zhu Y, et al. Staphylococcus aureus nasal carriage and its antibiotic resistance profiles in children in high altitude areas of southwestern China. *Arch Argent Pediatr*. 2017;115(3):274-6.
60. Gu FF, Han LZ, Chen X, Wang YC, Shen H, Wang JQ, et al. Molecular characterization of Staphylococcus aureus from surgical site infections in orthopedic patients in an orthopedic trauma clinical medical center in Shanghai. *Surg Infect (Larchmt)*. 2015;16(1):97-104.
61. Gu FF, Hou Q, Yang HH, Zhu YQ, Guo XK, Ni YX, et al. Characterization of Staphylococcus aureus Isolated from Non-Native Patients with Skin and Soft Tissue Infections in Shanghai. *PLoS One*. 2015;10(4):e0123557.
62. Gu FF, Zhang J, Zhao SY, Yang ZR, Zhang YL, Xiao SZ, et al. Risk factors for methicillin-resistant Staphylococcus aureus carriage among residents in 7 nursing homes in Shanghai, China. *Am J Infect Control*. 2016;44(7):805-8.
63. Gu FF, Chen Y, Dong DP, Song Z, Guo XK, Ni YX, et al. Molecular epidemiology of staphylococcus aureus among patients with skin and soft tissue infections in two Chinese hospitals. *Chin Med J*. 2016;129(19):2319-24.
64. Hare KM, Singleton RJ, Grimwood K, Valery PC, Cheng AC, Morris PS, et al. Longitudinal nasopharyngeal carriage and antibiotic resistance of respiratory bacteria in indigenous Australian and Alaska native children with bronchiectasis. *PLoS One*. 2013;8(8):e70478.



65. Hart J, Hamilton EJ, Makepeace A, Davis WA, Latkovic E, Lim EM, et al. Prevalence, risk factors and sequelae of *Staphylococcus aureus* carriage in diabetes: the Fremantle Diabetes Study Phase II. *J Diabetes Complications*. 2015;29(8):1092-7.
66. He W, Chen H, Zhao C, Zhang F, Li H, Wang Q, et al. Population structure and characterisation of *Staphylococcus aureus* from bacteraemia at multiple hospitals in China: association between antimicrobial resistance, toxin genes and genotypes. *Int J Antimicrob Agents*. 2013;42(3):211-9.
67. Hill SE, Yung A, Rademaker M. Prevalence of *Staphylococcus aureus* and antibiotic resistance in children with atopic dermatitis: a New Zealand experience. *Australas J Dermatol*. 2011;52(1):27-31.
68. Ho PL, Chuang SK, Choi YF, Lee RA, Lit AC, Ng TK, et al. Community-associated methicillin-resistant and methicillin-sensitive *Staphylococcus aureus*: skin and soft tissue infections in Hong Kong. *Diagn Microbiol Infect Dis*. 2008;61(3):245-50.
69. Ho PL, Lai EL, Chow KH, Chow LS, Yuen KY, Yung RW. Molecular epidemiology of methicillin-resistant *Staphylococcus aureus* in residential care homes for the elderly in Hong Kong. *Diagn Microbiol Infect Dis*. 2008;61(2):135-42.
70. Ho PL, Chow KH, Lo PY, Lee KF, Lai EL. Changes in the epidemiology of methicillin-resistant *Staphylococcus aureus* associated with spread of the ST45 lineage in Hong Kong. *Diagn Microbiol Infect Dis*. 2009;64(2):131-7.
71. Ho PL, Chiu SS, Chan MY, Gan Y, Chow KH, Lai EL, et al. Molecular epidemiology and nasal carriage of *Staphylococcus aureus* and methicillin-resistant *S. aureus* among young children attending day care centers and kindergartens in Hong Kong. *J Infect*. 2012;64(5):500-6.

72. Ho PL, Lai EL, Chow KH. Carriage of methicillin-susceptible and -resistant *Staphylococcus aureus* by medical students in Hong Kong. *J Hosp Infect.* 2015;91(2):184-5.
73. Hsiao CH, Sun CC, Yeh LK, Ma DKH, Chen PYF, Lin HC, et al. Shifting trends in bacterial keratitis in Taiwan: A 10-year review in a tertiary-care hospital. *Cornea.* 2016;35(3):313-7.
74. Hsueh PR, Liu YC, Yang D, Yan JJ, Wu TL, Huang WK, et al. Multicenter surveillance of antimicrobial resistance of major bacterial pathogens in intensive care units in 2000 in Taiwan. *Microb Drug Resist.* 2001;7(4):373-82.
75. Hu FP, Guo Y, Zhu DM, Wang F, Jiang XF, Xu YC, et al. Resistance trends among clinical isolates in China reported from CHINET surveillance of bacterial resistance, 2005-2014. *Clin Microbiol Infect.* 2016;22 Suppl 1:S9-14.
76. Huang YC, Su LH, Chen CJ, Lin TY. Nasal carriage of methicillin-resistant *Staphylococcus aureus* in school children without identifiable risk factors in northern Taiwan. *Pediatr Infect Dis J.* 2005;24(3):276-8.
77. Huang YC, Chao AS, Chang SD, Chen YJ, Peng MT, Sung JH, et al. Association of *Staphylococcus aureus* colonization in parturient mothers and their babies. *Pediatr Infect Dis J.* 2009;28(8):742-4.
78. Huang CC, Wu CJ, Wang LR, Lee HC, Chang CM, Lee NY, et al. Antimicrobial susceptibility of bacteremic isolates from cancer patients with or without neutropenia at a medical center in southern Taiwan. *J Microbiol Immunol Infect.* 2011;44(5):376-81.
79. Huang YC, Su LH, Lin TY. Nasal carriage of methicillin-resistant *Staphylococcus aureus* among pediatricians in Taiwan. *PLoS One.* 2013;8(11):e82472.

80. Indrawattana N, Sungkhachat O, Sookrung N, Chongsa-nguan M, Tungtrongchitr A, Voravuthikunchai SP, et al. Staphylococcus aureus clinical isolates: antibiotic susceptibility, molecular characteristics, and ability to form biofilm. *Biomed Res Int.* 2013;2013:314654.
81. Ishihara K, Saito M, Shimokubo N, Muramatsu Y, Maetani S, Tamura Y. Methicillin-resistant Staphylococcus aureus carriage among veterinary staff and dogs in private veterinary clinics in Hokkaido, Japan. *Microbiol Immunol.* 2014;58(3):149-54.
82. Issler-Fisher AC, Fakin RM, Fisher OM, McKew G, Gazzola R, Rauch AK, et al. Microbiological findings in burn patients treated in a general versus a designated intensive care unit: Effect on length of stay. *Burns.* 2016;42(8):1805-18.
83. Jia XQ, Pang F, Chen JZ, Jiang LX. Prevalence and clinical distribution of multidrug-resistant bacteria (3537 isolates) in a tertiary Chinese hospital (January 2012-December 2013). *Pathol Biol (Paris).* 2015;63(1):21-3.
84. Jiang Y, Kuang L, Wang H, Li L, Zhou W, Li M. The Clinical Characteristics of Neonatal Sepsis Infection in Southwest China. *Intern Med.* 2016;55(6):597-603.
85. Jones RN, Castanheira M, Hu B, Ni Y, Lin SS, Mendes RE, et al. Update of contemporary antimicrobial resistance rates across China: reference testing results for 12 medical centers (2011). *Diagn Microbiol Infect Dis.* 2013;77(3):258-66.
86. Jordan D, Simon J, Fury S, Moss S, Giffard P, Maiwald M, et al. Carriage of methicillin-resistant Staphylococcus aureus by veterinarians in Australia. *Aust Vet J.* 2011;89(5):152-9.
87. Kang YC, Tai WC, Yu CC, Kang JH, Huang YC. Methicillin-resistant Staphylococcus aureus nasal carriage among patients receiving hemodialysis in Taiwan: prevalence rate, molecular characterization and de-colonization. *BMC Infect Dis.* 2012;12:284.

88. Kang YC, Hsiao CH, Yeh LK, Ma DH, Chen PY, Lin HC, et al. Methicillin-Resistant *Staphylococcus aureus* Ocular Infection in Taiwan: Clinical Features, Genotyping, and Antibiotic Susceptibility. *Medicine (Baltimore)*. 2015;94(42):e1620.
89. Kang GS, Jung YH, Kim HS, Lee YS, Park C, Lee KJ, et al. Prevalence of Major Methicillin-Resistant *Staphylococcus aureus* Clones in Korea Between 2001 and 2008. *Ann Lab Med*. 2016;36(6):536-41.
90. Kang S, Lee J, Kim M. The association between *Staphylococcus aureus* nasal colonization and symptomatic infection in children in Korea where ST72 is the major genotype: A prospective observational study. *Medicine (Baltimore)*. 2017;96(34):e7838.
91. Kawaguchiya M, Urushibara N, Kuwahara O, Ito M, Mise K, Kobayashi N. Molecular characteristics of community-acquired methicillin-resistant *Staphylococcus aureus* in Hokkaido, northern main island of Japan: identification of sequence types 6 and 59 Pantone-Valentine leucocidin-positive community-acquired methicillin-resistant *Staphylococcus aureus*. *Microb Drug Resist*. 2011;17(2):241-50.
92. Kim HJ, Lee K, Yoo JB, Song JW, Yoon JH. Bacteriological findings and antimicrobial susceptibility in chronic sinusitis with nasal polyp. *Acta Otolaryngol*. 2006;126(5):489-97.
93. Kim ES, Song JS, Lee HJ, Choe PG, Park KH, Cho JH, et al. A survey of community-associated methicillin-resistant *Staphylococcus aureus* in Korea. *J Antimicrob Chemother*. 2007;60(5):1108-14.
94. Kim ES, Kim HB, Kim G, Kim KH, Park KH, Lee S, et al. Clinical and epidemiological factors associated with methicillin resistance in community-onset invasive *Staphylococcus aureus* infections: prospective multicenter cross-sectional study in Korea. *PLoS One*. 2014;9(12):e114127.

95. Kim YJ, Kim SI, Choi JY, Yoon SK, You YK, Kim DG. Clinical significance of methicillin-resistant *Staphylococcus aureus* and vancomycin-resistant enterococci colonization in liver transplant recipients. *Korean J Intern Med.* 2015;30(5):694-704.
96. Kitti T, Boonyonying K, Sitthisak S. Prevalence of methicillin-resistant *Staphylococcus aureus* among university students in Thailand. *Southeast Asian J Trop Med Public Health.* 2011;42(6):1498-504.
97. Ko WC, Yang YY, Tsai TF, Cheng YF, Hung CM. Frequency of occurrence and susceptibility of pathogens associated with furuncle and carbuncle: A study in a regional hospital of Central Taiwan. *Dermatologica Sinica.* 2005;23(4):178-85.
98. Ko KS, Lee JY, Baek JY, Peck KR, Rhee JY, Kwon KT, et al. Characterization of *Staphylococcus aureus* nasal carriage from children attending an outpatient clinic in Seoul, Korea. *Microb Drug Resist.* 2008;14(1):37-44.
99. Ko KS, Lee MY, Baek JY, Kang E, Roh HJ, Cheong HS, et al. Methicillin-resistant *Staphylococcus aureus* blood isolates from the emergency department of a tertiary-care hospital in South Korea. *Int J Antimicrob Agents.* 2009;33(3):293-4.
100. Kok J, O'Sullivan MV, Gilbert GL. Feedback to clinicians on preventable factors can reduce hospital onset *Staphylococcus aureus* bacteraemia rates. *J Hosp Infect.* 2011;79(2):108-14.
101. Kunishima H, Yamamoto N, Kobayashi T, Minegishi M, Nakajima S, Chiba J, et al. Methicillin resistant *Staphylococcus aureus* in a Japanese community hospital: 5-year experience. *J Infect Chemother.* 2010;16(6):414-7.
102. Kuntaman K, Hadi U, Setiawan F, Koendori EB, Rusli M, Santosaningsih D, et al. Prevalence of Methicillin Resistant *Staphylococcus Aureus* From Nose and Throat of

Patients on Admission to Medical Wards of Dr Soetomo Hospital, Surabaya, Indonesia.

*Southeast Asian J Trop Med Public Health*. 2016;47(1):66-70.

103. Kuo CY, Huang DTN, Chi H, Lu CY, Chang LY, Chi CY, et al. Prevalence and molecular characterization of staphylococcus aureus colonization among neonatal intensive care units in Taiwan. *Neonatology*. 2014;105(2):142-8.

104. Kuroda T, Kinoshita Y, Niwa H, Shinzaki Y, Tamura N, Hobo S, et al. Methicillin-resistant *Staphylococcus aureus* colonisation and infection in thoroughbred racehorses and veterinarians in Japan. *Vet Rec*. 2016;178(19):473.

105. Kyaw WM, Lee LK, Siong WC, Ping ACL, Ang B, Leo YS. Prevalence of and risk factors for MRSA colonization in HIV-positive outpatients in Singapore. *AIDS Res Ther*. 2012;9 (no pagination)(33).

106. Lai CF, Liao CH, Pai MF, Chu FY, Hsu SP, Chen HY, et al. Nasal carriage of methicillin-resistant *Staphylococcus aureus* is associated with higher all-cause mortality in hemodialysis patients. *Clin J Am Soc Nephrol*. 2011;6(1):167-74.

107. Lai CC, Lin SH, Sheng WH, Hsueh PR. Decrease in the incidence of methicillin-resistant *Staphylococcus aureus* nosocomial bloodstream infections in Taiwan. *Int J Antimicrob Agents*. 2013;41(6):591-2.

108. Lai CC, Chen YH, Lin SH, Chung KP, Sheng WH, Ko WC, et al. Changing aetiology of healthcare-associated bloodstream infections at three medical centres in Taiwan, 2000-2011. *Epidemiol Infect*. 2014;142(10):2180-5.

109. Lauderdale TL, Wang JT, Lee WS, Huang JH, McDonald LC, Huang IW, et al. Carriage rates of methicillin-resistant *Staphylococcus aureus* (MRSA) depend on anatomic location,

the number of sites cultured, culture methods, and the distribution of clonotypes. *Eur J Clin Microbiol Infect Dis.* 2010;29(12):1553-9.

110. Le TA, Sohn AH, Nguyen PT, Vo TC, Vo VN, Tran Nguyen TH, et al. Microbiology of surgical site infections and associated antimicrobial use among Vietnamese orthopedic and neurosurgical patients. *Infect Control Hosp Epidemiol.* 2006;27(8):855-62.

111. Lee SO, Cho YK, Kim SY, Lee ES, Park SY, Seo YH. Comparison of trends of resistance rates over 3 years calculated from results for all isolates and for the first isolate of a given species from a patient. *J Clin Microbiol.* 2004;42(10):4776-9.

112. Lee YT, Lin JC, Wang NC, Peng MY, Chang FY. Necrotizing fasciitis in a medical center in northern Taiwan: emergence of methicillin-resistant *Staphylococcus aureus* in the community. *J Microbiol Immunol Infect.* 2007;40(4):335-41.

113. Lee J, Sung JY, Kim YM, Oh CE, Kim HB, Choi EH, et al. Molecular characterization of methicillin-resistant *Staphylococcus aureus* obtained from the anterior nares of healthy Korean children attending daycare centers. *Int J Infect Dis.* 2011;15(8):e558-63.

114. Lee K, Kim MN, Kim JS, Hong HL, Kang JO, Shin JH, et al. Further increases in carbapenem-, amikacin-, and fluoroquinolone-resistant isolates of *Acinetobacter* spp. and *P. aeruginosa* in Korea: KONSAR study 2009. *Yonsei Med J.* 2011;52(5):793-802.

115. Lee CY, Tsai HC, Kunin CM, Lee SS, Chen YS. Clinical and microbiological characteristics of purulent and non-purulent cellulitis in hospitalized Taiwanese adults in the era of community-associated methicillin-resistant *Staphylococcus aureus*. *BMC Infect Dis.* 2015;15:311.

116. Lestari ES, Severin JA, Filius PM, Kuntaman K, Duerink DO, Hadi U, et al. Antimicrobial resistance among commensal isolates of *Escherichia coli* and *Staphylococcus*

aureus in the Indonesian population inside and outside hospitals. *Eur J Clin Microbiol Infect Dis.* 2008;27(1):45-51.

117. Li T, Yu X, Xie J, Xu Y, Shang Y, Liu Y, et al. Carriage of virulence factors and molecular characteristics of *Staphylococcus aureus* isolates associated with bloodstream, and skin and soft tissue infections in children. *Epidemiol Infect.* 2013;141(10):2158-62.

118. Li Q, Zhuang T, Lin Y, Xi J, Yao G. Risk factors affecting nasal colonization of methicillin-resistant *Staphylococcus aureus* when admitted in intensive care unit. *Chin Med J (Engl).* 2014;127(10):1804-7.

119. Li YT, Yu CB, Huang JR, Qin ZJ, Li LJ. Pathogen profile and drug resistance analysis of spontaneous peritonitis in cirrhotic patients. *World J Gastroenterol.* 2015;21(36):10409-17.

120. Li X, Chen Y, Gao W, Ouyang W, Wei J, Wen Z. Epidemiology and Outcomes of Complicated Skin and Soft Tissue Infections among Inpatients in Southern China from 2008 to 2013. *PLoS One.* 2016;11(2):e0149960.

121. Liao CH, Chen SY, Chang SC, Hsueh PR, Hung CC, Chen YC. Characteristics of community-acquired and health care-associated *Staphylococcus aureus* bacteremia in patients treated at the emergency department of a teaching hospital. *Diagn Microbiol Infect Dis.* 2005;53(2):85-92.

122. Lim CJ, Cheng AC, Kennon J, Spelman D, Hale D, Melican G, et al. Prevalence of multidrug-resistant organisms and risk factors for carriage in long-term care facilities: a nested case-control study. *J Antimicrob Chemother.* 2014;69(7):1972-80.

123. Lin YC, Lauderdale TL, Lin HM, Chen PC, Cheng MF, Hsieh KS, et al. An outbreak of methicillin-resistant *Staphylococcus aureus* infection in patients of a pediatric intensive



care unit and high carriage rate among health care workers. *J Microbiol Immunol Infect.* 2007;40(4):325-34.

124. Lin TC, Chang CH, Hong SJ, Tsai YC. Methicillin-resistant *Staphylococcus aureus* in skin and soft tissue infections and minocyclin treatment experience in the dermatological setting of eastern Taiwan. *Dermatologica Sinica.* 2011;29(3):86-90.

125. Lin SW, Wang YH, Lee MY, Ku MS, Sun HL, Lu KH, et al. Clinical spectrum of acute rhinosinusitis among atopic and nonatopic children in Taiwan. *Int J Pediatr Otorhinolaryngol.* 2012;76(1):70-5.

126. Lin CD, Tsai MH, Lin CW, Ho MW, Wang CY, Tsou YA, et al. Association of adenoid hyperplasia and bacterial biofilm formation in children with adenoiditis in Taiwan. *Eur Arch Otorhinolaryngol.* 2012;269(2):503-11.

127. Lin WT, Chao CM, Lin HL, Hung MC, Lai CC. Emergence of antibiotic-resistant bacteria in patients with Fournier gangrene. *Surg Infect (Larchmt).* 2015;16(2):165-8.

128. Lin WT, Wu CD, Cheng SC, Chiu CC, Tseng CC, Chan HT, et al. High Prevalence of Methicillin-Resistant *Staphylococcus aureus* among Patients with Septic Arthritis Caused by *Staphylococcus aureus*. *PLoS One.* 2015;10(5):e0127150.

129. Lin J, Xu P, Peng Y, Lin D, Ou Q, Zhang T, et al. Prevalence and characteristics of *Staphylococcus aureus* and methicillin-resistant *Staphylococcus aureus* nasal colonization among a community-based diabetes population in Foshan, China. *J Diabetes Investig.* 2016.

130. Lin TC, Wu RX, Chiu CC, Yang YS, Lee Y, Lin JC, et al. The clinical and microbiological characteristics of infections in burn patients from the Formosa Fun Coast Dust Explosion. *J Microbiol Immunol Infect.* 2017.

131. Ling JM, Lam AW, Chan EW, Cheng AF. What have we learnt from community-acquired infections in Hong Kong? *J Antimicrob Chemother.* 2003;51(4):895-904.
132. Liu C, Chen ZJ, Sun Z, Feng X, Zou M, Cao W, et al. Molecular characteristics and virulence factors in methicillin-susceptible, resistant, and heterogeneous vancomycin-intermediate *Staphylococcus aureus* from central-southern China. *J Microbiol Immunol Infect.* 2015;48(5):490-6.
133. Liu X, Liang J, Jiang Y, Wang B, Yuan H, Zhang L, et al. Molecular characteristics of community-acquired methicillin-resistant *Staphylococcus aureus* strains isolated from outpatients with skin and soft tissue infections in Wuhan, China. *Pathog Dis.* 2016;74(4):ftw026.
134. Liu Y, Xu Z, Yang Z, Sun J, Ma L. Characterization of community-associated *Staphylococcus aureus* from skin and soft-tissue infections: a multicenter study in China. *Emerg Microbes Infect.* 2016;5(12):e127.
135. Lu PL, Chin LC, Peng CF, Chiang YH, Chen TP, Ma L, et al. Risk factors and molecular analysis of community methicillin-resistant *Staphylococcus aureus* carriage. *J Clin Microbiol.* 2005;43(1):132-9.
136. Lu SY, Chang FY, Cheng CC, Lee KD, Huang YC. Methicillin-resistant *Staphylococcus aureus* nasal colonization among adult patients visiting emergency department in a medical center in Taiwan. *PLoS One.* 2011;6(6):e18620.
137. Luk S, Ho AY, Ng TK, Tsang IH, Chan EH, Choi KW, et al. Prevalence, prediction, and clonality of methicillin-resistant *Staphylococcus aureus* carriage at admission to medical units in Hong Kong, China. *Infect Control Hosp Epidemiol.* 2014;35(1):42-8.

138. Ma XX, Sun DD, Wang S, Wang ML, Li M, Shang H, et al. Nasal carriage of methicillin-resistant *Staphylococcus aureus* among preclinical medical students: epidemiologic and molecular characteristics of methicillin-resistant *S. aureus* clones. *Diagn Microbiol Infect Dis.* 2011;70(1):22-30.
139. Macmorran E, Harch S, Athan E, Lane S, Tong S, Crawford L, et al. The rise of methicillin resistant *Staphylococcus aureus*: now the dominant cause of skin and soft tissue infection in Central Australia. *Epidemiol Infect.* 2017;145(13):2817-26.
140. Marshall C, McBryde E. The role of *Staphylococcus aureus* carriage in the pathogenesis of bloodstream infection. *BMC Res Notes.* 2014;7:428.
141. Mat Azis N, Pung HP, Abdul Rachman AR, Amin Nordin S, Sarchio SNE, Suhaili Z, et al. A persistent antimicrobial resistance pattern and limited methicillin-resistance-associated genotype in a short-term *Staphylococcus aureus* carriage isolated from a student population. *J Infect Public Health.* 2017;10(2):156-64.
142. McDonald LC, Lauderdale TL, Shiao YR, Chen PC, Lai JF, Wang HY, et al. The status of antimicrobial resistance in Taiwan among Gram-positive pathogens: the Taiwan Surveillance of Antimicrobial Resistance (TSAR) programme, 2000. *Int J Antimicrob Agents.* 2004;23(4):362-70.
143. Mendes RE, Mendoza M, Banga Singh KK, Castanheira M, Bell JM, Turnidge JD, et al. Regional resistance surveillance program results for 12 Asia-Pacific nations (2011). *Antimicrob Agents Chemother.* 2013;57(11):5721-6.
144. Mine Y, Nakasone I, Yamamoto Y, Utani A, Yamane N, Uezato H, et al. Dissemination of panton-valentine leukocidin-positive methicillin-resistant *Staphylococcus aureus* in Okinawa, Japan. *J Dermatol.* 2013;40(1):34-8.

145. Moon HW, Kim HJ, Hur M, Yun YM. Antimicrobial susceptibility profiles of *Staphylococcus aureus* isolates classified according to their origin in a tertiary hospital in Korea. *Am J Infect Control*. 2014;42(12):1340-2.
146. Myat TO, Prasad N, Thinn KK, Win KK, Htike WW, Zin KN, et al. Bloodstream infections at a tertiary referral hospital in Yangon, Myanmar. *Trans R Soc Trop Med Hyg*. 2014;108(11):692-8.
147. Nair R, Hanson BM, Kondratowicz K, Dorjpurev A, Davaadash B, Enkhtuya B, et al. Antimicrobial resistance and molecular epidemiology of *Staphylococcus aureus* from Ulaanbaatar, Mongolia. *PeerJ*. 2014;2014 (1) (no pagination)(e176).
148. Van Nguyen K, Zhang T, Thi Vu BN, Dao TT, Tran TK, Thi Nguyen DN, et al. *Staphylococcus aureus* nasopharyngeal carriage in rural and urban northern Vietnam. *Trans R Soc Trop Med Hyg*. 2014;108(12):783-90.
149. Nickerson EK, Wuthiekanun V, Wongsuvan G, Limmathurosakul D, Srisamang P, Mahavanakul W, et al. Factors predicting and reducing mortality in patients with invasive *Staphylococcus aureus* disease in a developing country. *PLoS One*. 2009;4(8):e6512.
150. Nickerson EK, Hongsuwan M, Limmathurotsakul D, Wuthiekanun V, Shah KR, Srisomang P, et al. *Staphylococcus aureus* bacteraemia in a tropical setting: Patient outcome and impact of antibiotic resistance. *PLoS One*. 2009;4 (1) (no pagination)(e4308).
151. Nickerson EK, Wuthiekanun V, Kumar V, Amornchai P, Wongdeethai N, Chheng K, et al. Emergence of Community-Associated Methicillin-Resistant *Staphylococcus aureus* Carriage in Children in Cambodia. *Am J Trop Med Hyg*. 2011;84(2):313-7.
152. Niki Y, Hanaki H, Yagisawa M, Kohno S, Aoki N, Watanabe A, et al. The first nationwide surveillance of bacterial respiratory pathogens conducted by the Japanese

Society of Chemotherapy. Part 1: a general view of antibacterial susceptibility. *J Infect Chemother.* 2008;14(4):279-90.

153. Niki Y, Hanaki H, Matsumoto T, Yagisawa M, Kohno S, Aoki N, et al. Nationwide surveillance of bacterial respiratory pathogens conducted by the Japanese Society of Chemotherapy in 2007: general view of the pathogens' antibacterial susceptibility. *J Infect Chemother.* 2009;15(3):156-67.

154. Niki Y, Hanaki H, Matsumoto T, Yagisawa M, Kohno S, Aoki N, et al. Nationwide surveillance of bacterial respiratory pathogens conducted by the Japanese Society of Chemotherapy in 2008: general view of the pathogens' antibacterial susceptibility. *J Infect Chemother.* 2011;17(4):510-23.

155. Nimmo GR, Pearson JC, Collignon PJ, Christiansen KJ, Coombs GW, Bell JM, et al. Prevalence of MRSA among *Staphylococcus aureus* isolated from hospital inpatients, 2005: report from the Australian Group for Antimicrobial Resistance. *Commun Dis Intell Q Rep.* 2007;31(3):288-96.

156. Nimmo GR, Pearson JC, Collignon PJ, Christiansen KJ, Coombs GW, Bell JM, et al. Antimicrobial susceptibility of *Staphylococcus aureus* isolated from hospital inpatients, 2009: report from the Australian Group on Antimicrobial Resistance. *Commun Dis Intell Q Rep.* 2011;35(3):237-43.

157. Nimmo GR, Bergh H, Nakos J, Whiley D, Marquess J, Huygens F, et al. Replacement of healthcare-associated MRSA by community-associated MRSA in Queensland: confirmation by genotyping. *J Infect.* 2013;67(5):439-47.

158. Nishikawa M, Tanaka T, Nakashima K, Senda K, Shibasaki M, Miura H, et al. Screening for methicillin-resistant *Staphylococcus aureus* (MRSA) carriage on admission to a geriatric hospital. *Arch Gerontol Geriatr.* 2009;49(2):242-5.
159. Ong SJ, Huang YC, Tan HY, Ma DH, Lin HC, Yeh LK, et al. *Staphylococcus aureus* keratitis: a review of hospital cases. *PLoS One.* 2013;8(11):e80119.
160. Otsuka T, Zaraket H, Fujii K, Masuda Y, Komiyama K, Ishikawa Y, et al. Molecular epidemiology of methicillin-resistant *Staphylococcus aureus* isolated from children in a community with low antimicrobial pressure in Japan. *Jpn J Infect Dis.* 2012;65(6):483-8.
161. Ozaki K, Takano M, Higuchi W, Takano T, Yabe S, Nitahara Y, et al. Genotypes, intrafamilial transmission, and virulence potential of nasal methicillin-resistant *Staphylococcus aureus* from children in the community. *J Infect Chemother.* 2009;15(2):84-91.
162. Patchanee P, Tadee P, Arjkumpa O, Love D, Chanachai K, Alter T, et al. Occurrence and characterization of livestock-associated methicillin-resistant *Staphylococcus aureus* in pig industries of northern Thailand. *J Vet Sci.* 2014;15(4):529-36.
163. Pei F, Chu J, Liu Y, Wang L, Zhang F, Ji M, et al. A surveillance of antimicrobial resistance in a University-affiliated Hospital in north China in 2012. *J Pure Appl Microbio.* 2013;7(4):3077-83.
164. Phetsouvanh R, Phongmany S, Soukaloun D, Rasachak B, Soukhaseum V, Soukhaseum S, et al. Causes of community-acquired bacteremia and patterns of antimicrobial resistance in Vientiane, Laos. *Am J Trop Med Hyg.* 2006;75(5):978-85.

165. Qiao Y, Ning X, Chen Q, Zhao R, Song W, Zheng Y, et al. Clinical and molecular characteristics of invasive community-acquired *Staphylococcus aureus* infections in Chinese children. *BMC Infect Dis*. 2014;14:582.
166. Qu F, Cui E, Guo T, Li H, Chen S, Liu L, et al. Nasal colonization of and clonal transmission of methicillin-susceptible *Staphylococcus aureus* among Chinese military volunteers. *J Clin Microbiol*. 2010;48(1):64-9.
167. Rahman ZA, Harun A, Hasan H, Mohamed Z, Noor SS, Deris ZZ, et al. Ocular surface infections in northeastern state of Malaysia: a 10-year review of bacterial isolates and antimicrobial susceptibility. *Eye Contact Lens*. 2013;39(5):355-60.
168. Raja NS. Microbiology of diabetic foot infections in a teaching hospital in Malaysia: a retrospective study of 194 cases. *J Microbiol Immunol Infect*. 2007;40(1):39-44.
169. Raymond NJ, Blackmore TK, Humble MW, Jones MR. Bloodstream infections in a secondary and tertiary care hospital setting. *Intern Med J*. 2006;36(12):765-72.
170. Reinprayoon U, Sitthanon S, Kasetsuwan N, Chongthaleong A. Bacteriological findings and antimicrobial susceptibility pattern of isolated pathogens from visual threatening ocular infections. *J Med Assoc Thai*. 2015;98 Suppl 1:S70-6.
171. Safari D, Harimurti K, Khoeri MM, Waslia L, Mudaliana S, A'Yun H Q, et al. *Staphylococcus aureus* and *Streptococcus pneumoniae* prevalence among elderly adults in Jakarta, Indonesia. *Southeast Asian J Trop Med Public Health*. 2015;46(3):465-71.
172. Santosaningsih D, Santoso S, Budayanti NS, Kuntaman K, Lestari ES, Farida H, et al. Epidemiology of *Staphylococcus aureus* harboring the *mecA* or Panton-Valentine leukocidin genes in hospitals in Java and Bali, Indonesia. *Am J Trop Med Hyg*. 2014;90(4):728-34.

173. Schlebusch S, Schooneveldt JM, Huygens F, Nimmo GR. Prevalence of *Staphylococcus aureus* strains in an Australian cohort, 1989-2003: evidence for the low prevalence of the toxic shock toxin and Panton-Valentine leukocidin genes. *Eur J Clin Microbiol Infect Dis*. 2009;28(10):1183-9.
174. Seki M, Takahashi H, Yamamoto N, Hamaguchi S, Ojima M, Hirose T, et al. Polymerase chain reaction-based active surveillance of MRSA in emergency department patients. *Infect Drug Resist*. 2015;8:113-8.
175. Shin E, Hong H, Park J, Oh Y, Jung J, Lee Y. Characterization of *Staphylococcus aureus* faecal isolates associated with food-borne disease in Korea. *J Appl Microbiol*. 2016.
176. Song J-H, Hsueh P-R, Chung DR, Ko KS, Kang C-I, Peck KR, et al. Spread of methicillin-resistant *Staphylococcus aureus* between the community and the hospitals in Asian countries: an ANSORP study. *J Antimicrob Chemother*. 2011;66(5):1061-9.
177. Song Z, Gu FF, Guo XK, Ni YX, He P, Han LZ. Antimicrobial resistance and molecular characterization of *Staphylococcus aureus* causing childhood pneumonia in Shanghai. *Front Microbiol*. 2017;8 (MAR) (no pagination)(455).
178. Strachan RE, Cornelius A, Gilbert GL, Gulliver T, Martin A, McDonald T, et al. Bacterial causes of empyema in children, Australia, 2007-2009. *Emerg Infect Dis*. 2011;17(10):1839-45.
179. Sukhumungoon P, Hayeebilan F, Yadrak P, Kanobthammakul S, Nakaguchi Y, Saengsuwan P, et al. Molecular characterization and relationship of methicillin-resistant *Staphylococcus aureus* among strains from healthy carriers and university hospital patients, southern Thailand. *Southeast Asian J Trop Med Public Health*. 2014;45(2):402-12.



180. Sun Z, Li L, Zhu X, Ma Y, Li J, Shen Z, et al. Analysis on antimicrobial resistance of clinical bacteria isolated from county hospitals and a teaching hospital. *J Huazhong Univ Sci Technolog Med Sci.* 2006;26(3):386-8.
181. Suzuki K, Kurono Y, Ikeda K, Watanabe A, Iwamoto A, Totsuka K, et al. Nationwide surveillance of 6 otorhinolaryngological infectious diseases and antimicrobial susceptibility pattern in the isolated pathogens in Japan. *J Infect Chemother.* 2015;21(7):483-91.
182. Syafinaz AM, Nur Ain NZ, Nadzirahi SN, Fatimah JS, Shahram A, Nasir MD. Staphylococcus aureus Nasal Carriers Among Medical Students in A Medical School. *Med J Malaysia.* 2012;67(6):636-8.
183. Taguchi H, Matsumoto T, Ishikawa H, Ohta S, Yukioka T. Prevalence of methicillin-resistant Staphylococcus aureus based on culture and PCR in inpatients at a tertiary care center in Tokyo, Japan. *J Infect Chemother.* 2012;18(5):630-6.
184. Takadama S, Nakaminami H, Aoki S, Akashi M, Wajima T, Ikeda M, et al. Prevalence of skin infections caused by Panton-Valentine leukocidin-positive methicillin-resistant Staphylococcus aureus in Japan, particularly in Ishigaki, Okinawa. *J Infect Chemother.* 2017;23(11):800-3.
185. Takesue Y, Watanabe A, Hanaki H, Kusachi S, Matsumoto T, Iwamoto A, et al. Nationwide surveillance of antimicrobial susceptibility patterns of pathogens isolated from surgical site infections (SSI) in Japan. *J Infect Chemother.* 2012;18(6):816-26.
186. Takesue Y, Kusachi S, Mikamo H, Sato J, Watanabe A, Kiyota H, et al. Antimicrobial susceptibility of pathogens isolated from surgical site infections in Japan: Comparison of data from nationwide surveillance studies conducted in 2010 and 2014-2015. *J Infect Chemother.* 2017;23(6):339-48.

187. Tang CS, Wang CC, Huang CF, Chen SJ, Tseng MH, Lo WT. Antimicrobial susceptibility of *Staphylococcus aureus* in children with atopic dermatitis. *Pediatr Int*. 2011;53(3):363-7.
188. Thuy DB, Campbell J, Hoang NVM, Trinh TTT, Duong HTH, Hieu NC, et al. A one-year prospective study of colonization with antimicrobial-resistant organisms on admission to a Vietnamese intensive care unit. *PLoS One*. 2017;12(9):e0184847.
189. Tong SY, Varrone L, Chatfield MD, Beaman M, Giffard PM. Progressive increase in community-associated methicillin-resistant *Staphylococcus aureus* in Indigenous populations in northern Australia from 1993 to 2012. *Epidemiol Infect*. 2015;143(7):1519-23.
190. Treerichod A, Hantagool S, Prommalikit O. Nasal carriage and antimicrobial susceptibility of *Staphylococcus aureus* among medical students at the HRH Princess Maha Chakri Sirindhorn Medical Center, Thailand: a cross sectional study. *J Infect Public Health*. 2013;6(3):196-201.
191. Tsai MS, Chen CJ, Lin TY, Huang YC. Nasal methicillin-resistant *Staphylococcus aureus* colonization among otherwise healthy children aged between 2 months and 5 years in northern Taiwan, 2005-2010. *J Microbiol Immunol Infect*. 2017.
192. Tsao FY, Kou HW, Huang YC. Dissemination of methicillin-resistant *Staphylococcus aureus* sequence type 45 among nursing home residents and staff in Taiwan. *Clin Microbiol Infect*. 2015;21(5):451-8.
193. Uehara Y, Kuwahara-Arai K, Hori S, Kikuchi K, Yanai M, Hiramatsu K. Investigation of nasal methicillin-resistant *Staphylococcus aureus* carriage in a haemodialysis clinic in Japan. *J Hosp Infect*. 2013;84(1):81-4.

194. Valle DL, Paclibare PAP, Cabrera EC, Rivera WL. Molecular and phenotypic characterization of methicillin-resistant staphylococcus aureus isolates from a tertiary hospital in the Philippines. *Trop Med Health*. 2016;44 (1) (no pagination)(3).
195. Verwer PE, Robinson JO, Coombs GW, Wijesuriya T, Murray RJ, Verbrugh HA, et al. Prevalence of nasal methicillin-resistant Staphylococcus aureus colonization in healthcare workers in a Western Australian acute care hospital. *Eur J Clin Microbiol Infect Dis*. 2012;31(6):1067-72.
196. Wang JT, Lin SF, Chiu HL, Wang LC, Tai HM, Jiang CF, et al. Molecular epidemiology and control of nosocomial methicillin-resistant Staphylococcus aureus infection in a teaching hospital. *J Formos Med Assoc*. 2004;103(1):32-6.
197. Wang JL, Chen SY, Wang JT, Wu GH, Chiang WC, Hsueh PR, et al. Comparison of both clinical features and mortality risk associated with bacteremia due to community-acquired methicillin-resistant Staphylococcus aureus and methicillin-susceptible S. aureus. *Clin Infect Dis*. 2008;46(6):799-806.
198. Wang CY, Wu VC, Chen YM, Su CT, Wu KD, Hsueh PR. Nasal carriage of methicillin-resistant Staphylococcus aureus among patients with end-stage renal disease. *Infect Control Hosp Epidemiol*. 2009;30(1):93-4.
199. Wang JT, Liao CH, Fang CT, Chie WC, Lai MS, Lauderdale TL, et al. Prevalence of and risk factors for colonization by methicillin-resistant Staphylococcus aureus among adults in community settings in Taiwan. *J Clin Microbiol*. 2009;47(9):2957-63.
200. Wang JT, Liao CH, Fang CT, Chie WC, Lai MS, Lauderdale TL, et al. Incidence of and risk factors for community-associated methicillin-resistant Staphylococcus aureus acquired

infection or colonization in intensive-care-unit patients. *J Clin Microbiol.*

2010;48(12):4439-44.

201. Wang L, Liu Y, Yang Y, Huang G, Wang C, Deng L, et al. Multidrug-resistant clones of community-associated methicillin-resistant *Staphylococcus aureus* isolated from Chinese children and the resistance genes to clindamycin and mupirocin. *J Med Microbiol.*

2012;61(Pt 9):1240-7.

202. Wang CY, Wu VC, Wang WJ, Lin YF, Lin YH, Chen YM, et al. Risk factors for nasal carriage of methicillin-resistant *Staphylococcus aureus* among patients with end-stage renal disease in Taiwan. *J Formos Med Assoc.* 2012;111(1):14-8.

203. Wang JT, Hsu LY, Lauderdale TL, Fan WC, Wang FD. Comparison of Outcomes among Adult Patients with Nosocomial Bacteremia Caused by Methicillin-Susceptible and Methicillin-Resistant *Staphylococcus aureus*: A Retrospective Cohort Study. *PLoS One.*

2015;10(12):e0144710.

204. Wang HK, Huang CY, Chen CJ, Huang YC. Nasal *Staphylococcus aureus* and methicillin-resistant *Staphylococcus aureus* carriage among college student athletes in northern Taiwan. *J Microbiol Immunol Infect.* 2017;50(4):537-40.

205. Wang R, Li X, Wang Q, Zhang Y, Wang H. Microbiological characteristics and clinical features of cardiac implantable electronic device infections at a Tertiary Hospital in China. *Front Microbiol.* 2017;8 (MAR) (no pagination)(360).

206. Wang XL, Li L, Li SM, Huang JY, Fan YP, Yao ZJ, et al. Phenotypic and molecular characteristics of *Staphylococcus aureus* and methicillin-resistant *Staphylococcus aureus* in slaughterhouse pig-related workers and control workers in Guangdong Province, China. *Epidemiol Infect.* 2017;145(9):1843-51.

207. Watanabe A, Yanagihara K, Matsumoto T, Kohno S, Aoki N, Oguri T, et al. Nationwide surveillance of bacterial respiratory pathogens conducted by the Surveillance Committee of Japanese Society of Chemotherapy, Japanese Association for Infectious Diseases, and Japanese Society for Clinical Microbiology in 2009: general view of the pathogens' antibacterial susceptibility. *J Infect Chemother*. 2012;18(5):609-20.
208. Watanabe S, Ohnishi T, Yuasa A, Kiyota H, Iwata S, Kaku M, et al. The first nationwide surveillance of antibacterial susceptibility patterns of pathogens isolated from skin and soft-tissue infections in dermatology departments in Japan. *J Infect Chemother*. 2017;23(8):503-11.
209. Williamson DA, Ritchie S, Keren B, Harrington M, Thomas MG, Upton A, et al. Persistence, discordance and diversity of staphylococcus aureus nasal and oropharyngeal colonization in school-aged children. *Pediatr Infect Dis J*. 2016;35(7):744-8.
210. Win MK, Soliman TA, Lee LK, Wong CS, Chow A, Ang B, et al. Review of a two-year methicillin-resistant Staphylococcus aureus screening program and cost-effectiveness analysis in Singapore. *BMC Infect Dis*. 2015;15:391.
211. Wu CJ, Ko WC, Ho MW, Lin HH, Yange YL, Lin JN, et al. Prevalence of and risk factors for methicillin-resistant staphylococcus aureus colonization among human immunodeficient virus-infected outpatients in taiwan: Oral candida colonization as a comparator. *J Oral Microbiol*. 2017;9 (1) (no pagination)(446).
212. Xiao Y, Wei Z, Shen P, Ji J, Sun Z, Yu H, et al. Bacterial-resistance among outpatients of county hospitals in China: significant geographic distinctions and minor differences between central cities. *Microbes Infect*. 2015;17(6):417-25.

213. Xu Z, Xie J, Peters BM, Li B, Li L, Yu G, et al. Longitudinal surveillance on antibiogram of important Gram-positive pathogens in Southern China, 2001 to 2015. *Microb Pathog.* 2017;103:80-6.
214. Yamaguchi K, Ohno A. Investigation of the susceptibility trends in Japan to fluoroquinolones and other antimicrobial agents in a nationwide collection of clinical isolates: a longitudinal analysis from 1994 to 2002. *Diagn Microbiol Infect Dis.* 2005;52(2):135-43.
215. Yan X, Song Y, Yu X, Tao X, Yan J, Luo F, et al. Factors associated with *Staphylococcus aureus* nasal carriage among healthy people in northern China. *Clin Microbiol Infect.* 2015;21(2):157-62.
216. Yanagihara K, Kadota J, Aoki N, Matsumoto T, Yoshida M, Yagisawa M, et al. Nationwide surveillance of bacterial respiratory pathogens conducted by the surveillance committee of Japanese Society of Chemotherapy, the Japanese Association for Infectious Diseases, and the Japanese Society for Clinical Microbiology in 2010: General view of the pathogens' antibacterial susceptibility. *J Infect Chemother.* 2015;21(6):410-20.
217. Ye X, Liu W, Fan Y, Wang X, Zhou J, Yao Z, et al. Frequency-risk and duration-risk relations between occupational livestock contact and methicillin-resistant *Staphylococcus aureus* carriage among workers in Guangdong, China. *Am J Infect Control.* 2015;43(7):676-81.
218. Yeap AD, Woods K, Dance DAB, Pichon B, Rattanavong S, Davong V, et al. Molecular Epidemiology of *Staphylococcus aureus* Skin and Soft Tissue Infections in the Lao People's Democratic Republic. *Am J Trop Med Hyg.* 2017;97(2):423-8.

219. Yeoh LY, Tan FL, Willis GC, Ooi ST. Methicillin-resistant *Staphylococcus aureus* carriage in hospitalized chronic hemodialysis patients and its predisposing factors. *Hemodial Int.* 2014;18(1):142-7.
220. Yong D, Shin HB, Kim YK, Cho J, Lee WG, Ha GY, et al. Increase in the prevalence of carbapenem-resistant acinetobacter isolates and ampicillin-resistant non-typhoidal *Salmonella* species in Korea: A KONSAR Study Conducted in 2011. *Infect Chemother.* 2014;46(2):84-93.
221. Young BE, Lye DC, Krishnan P, Chan SP, Leo YS. A prospective observational study of the prevalence and risk factors for colonization by antibiotic resistant bacteria in patients at admission to hospital in Singapore. *BMC Infect Dis.* 2014;14:298.
222. Yu F, Liu Y, Lv J, Qi X, Lu C, Ding Y, et al. Antimicrobial susceptibility, virulence determinant carriage and molecular characteristics of *Staphylococcus aureus* isolates associated with skin and soft tissue infections. *Braz J Infect Dis.* 2015;19(6):614-22.
223. Zhang B, Liu Z, Lin Z, Zhang X, Fu W. Microbiologic characteristics of pathogenic bacteria from hospitalized trauma patients who survived Wenchuan earthquake. *Eur J Clin Microbiol Infect Dis.* 2012;31(10):2529-35.
224. Zhang J, Gu FF, Zhao SY, Xiao SZ, Wang YC, Guo XK, et al. Prevalence and Molecular Epidemiology of *Staphylococcus aureus* among Residents of Seven Nursing Homes in Shanghai. *PLoS One.* 2015;10(9):e0137593.
225. Zhang R, Wang F, Kang J, Wang X, Yin D, Dang W, et al. Prevalence of multidrug resistant gram-positive cocci in a Chinese hospital over an 8-year period. *Int J Clin Exp Med.* 2015;8(6):9462-9.

226. Zhao C, Sun H, Wang H, Liu Y, Hu B, Yu Y, et al. Antimicrobial resistance trends among 5608 clinical Gram-positive isolates in China: results from the Gram-Positive Cocci Resistance Surveillance program (2005-2010). *Diagn Microbiol Infect Dis*. 2012;73(2):174-81.
227. Zhao C, Zhao M, Yu Y, Sun Q, Chen H, Jiang W, et al. Characterization of community acquired staphylococcus aureus associated with skin and soft tissue infection in Beijing: High prevalence of PVL+ ST398. *PLoS One*. 2012;7 (6) (no pagination)(e38577).
228. Zhou J, Huang H, Liu S, Yu P, Wan Q. Staphylococcus Aureus bacteremias following liver transplantation: A clinical analysis of 20 cases. *Ther Clin Risk Manag*. 2015;11:933-7.
229. Zhu X, Tong A, Wang D, Sun H, Chen L, Dong M. Antibiotic resistance patterns of Gram-negative and Gram-positive strains isolated from inpatients with nosocomial infections in a tertiary hospital in Beijing, China from 2011 to 2014. *J Chemother*. 2016:1-4.
230. Zou MX, Zhou RR, Wu WJ, Zhang NJ, Liu WE, Hu FP, et al. Antimicrobial resistance and molecular epidemiological characteristics of clinical isolates of Staphylococcus aureus in Changsha area. *Chin Med J (Engl)*. 2012;125(13):2289-94.
